# Supplementary material for: Furan- and Thiophene-2-Carbonyl Amino Acid Derivatives Activate Hypoxia-Inducible Factor via Inhibition of Factor Inhibiting Hypoxia-Inducible Factor-1
Source: MDPI journal article supplement (doi:10.3390/molecules23040885), 2018-04-11

## Supporting Information for

### Furan- and thiophene-2-carbonyl amino acid derivatives activate the hypoxia inducible factor via inhibition of factor inhibiting HIF-1

**Shin-ichi Kawaguchi** <sup>1,2,3</sup>, **Yuhei Gonda** <sup>2</sup>, **Takuya Yamamoto** <sup>2</sup>, **Yuki Sato** <sup>2</sup>, **Hiroyuki Shinohara** <sup>2</sup>, **Yohsuke Kobiki** <sup>2</sup>, **Atsuhiko Ichimura** <sup>3,4</sup>, **Takashi Dan** <sup>3</sup>, **Motohiro Sonoda** <sup>2,5</sup>, **Toshio Miyata** <sup>3</sup> **Akiya Ogawa** <sup>2</sup>, and **Tadayuki Tsujita** <sup>3,6,\*</sup>

<sup>1</sup> Center for Education and Research in Agricultural Innovation, Faculty of Agriculture, Saga University, 152-1 Shonan-cho, Karatsu, Saga 847-0021, Japan; skawa@cc.saga-u.ac.jp

<sup>2</sup> Department of Applied Chemistry, Graduate School of Engineering, Osaka Prefecture University, 1-1 Gakuen-cho, Naka-ku, Sakai, Osaka 599-8531, Japan

<sup>3</sup> Department of Molecular Medicine and Therapy, Tohoku University Graduate School of Medicine, 2-1 Seiryō-machi, Aobaku, Sendai, Miyagi 980-8575, Japan

<sup>4</sup> Keihanshin Consortium for Fostering the Next Generation of Global Leaders in Research (K-CONNEX), Kyoto University, Kyoto 606-8501, Japan

<sup>5</sup> Department of Applied Biosciences, Graduate School of Life and Environmental Sciences, Osaka Prefecture University, 1-1 Gakuen-cho, Naka-ku, Sakai, Osaka 599-8531, Japan

<sup>6</sup> Department of Applied Biochemistry and Food Science, Faculty of Agriculture, Saga University, 1 Honjo-machi, Saga, 840-8502, Japan; tada@cc.saga-u.ac.jp

\* Correspondence: tada@cc.saga-u.ac.jp; Tel.: +81-952-28-8771

## CONTENTS

|                                                                              | page   |
|------------------------------------------------------------------------------|--------|
| <b>HPLC chart of compound 16</b>                                             | S3     |
| <b>Copies of <math>^1\text{H}</math> NMR spectra of the compounds (1-44)</b> | S4-S25 |

HPLC chart for compound 16 (solvent : hexane/2-propanol = 1/ 1)

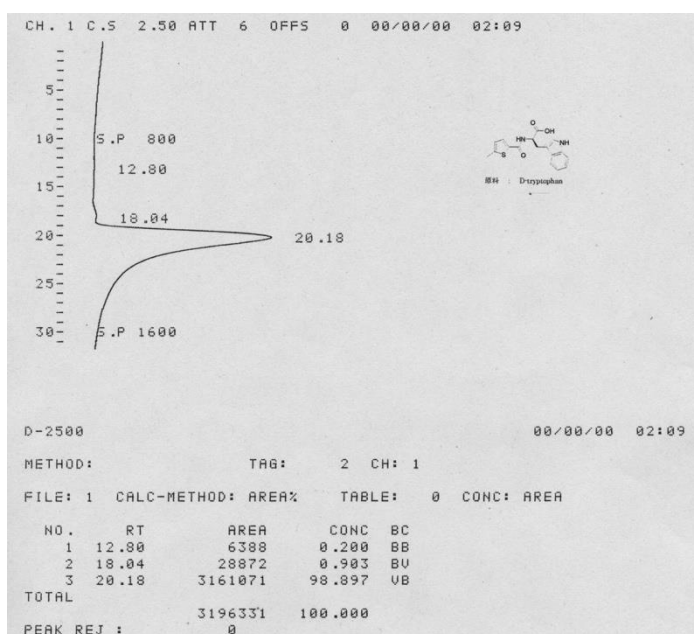

HPLC chart for the RS-racemic mixture of (5-methylthiophene-2-carbonyl)tryptophan

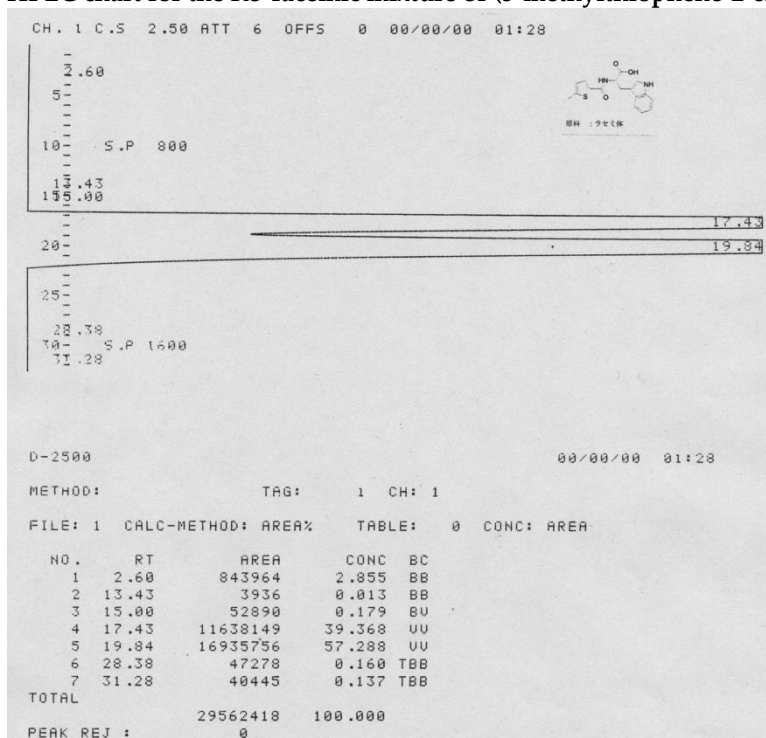

### <sup>1</sup>H NMR spectrum for compound 1

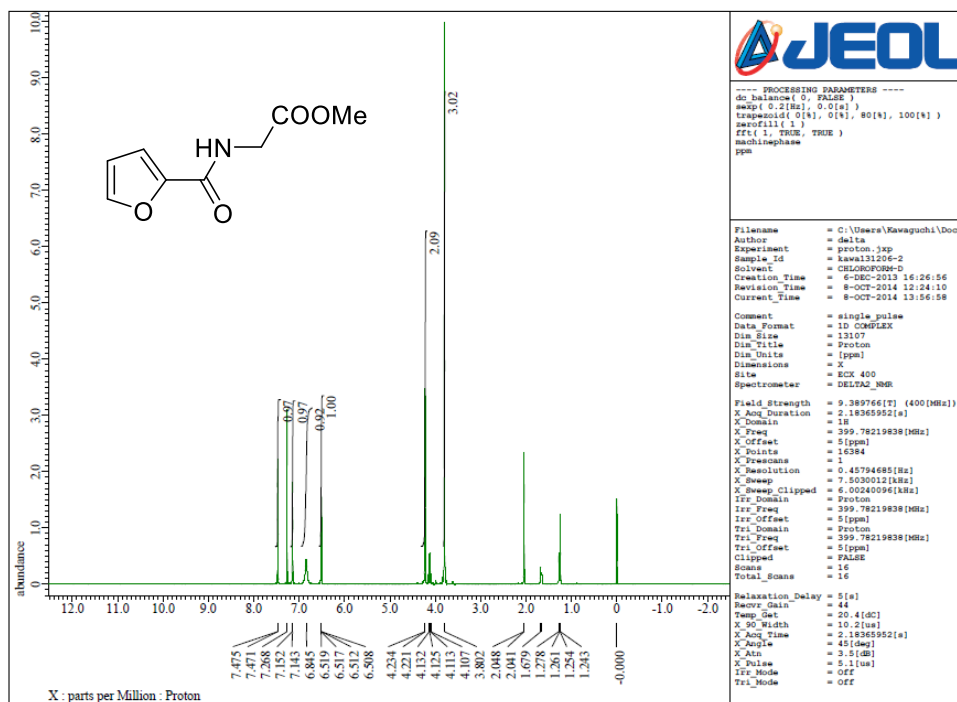

### <sup>1</sup>H NMR spectrum for compound 2

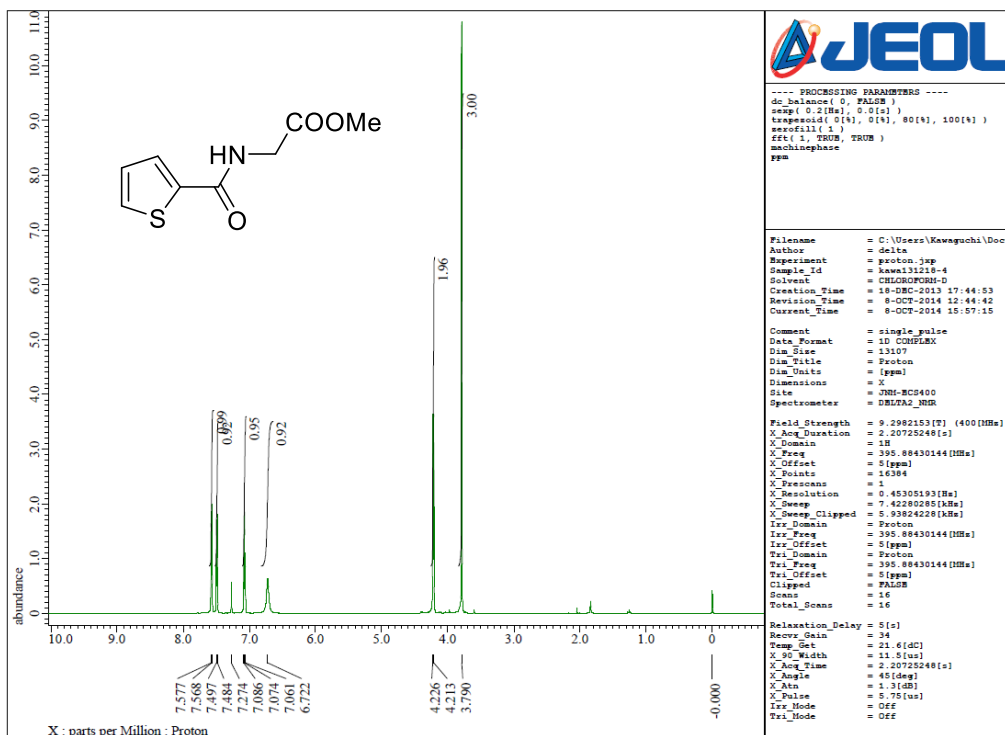

<sup>1</sup>H NMR spectrum for compound 3

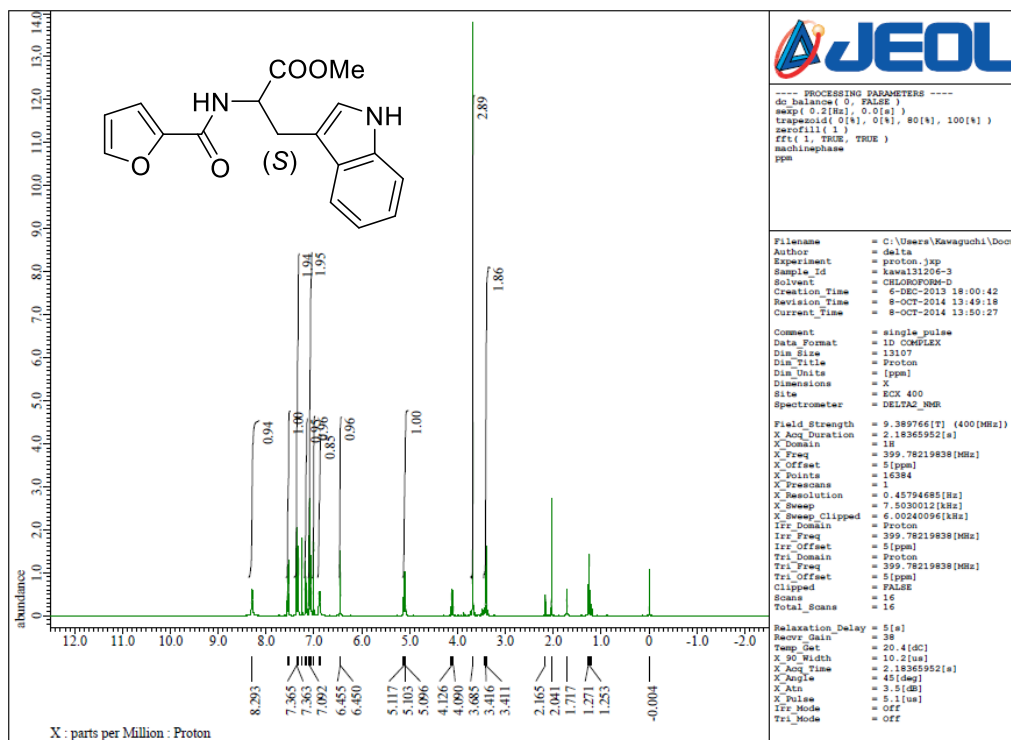

<sup>1</sup>H NMR spectrum for compound 4

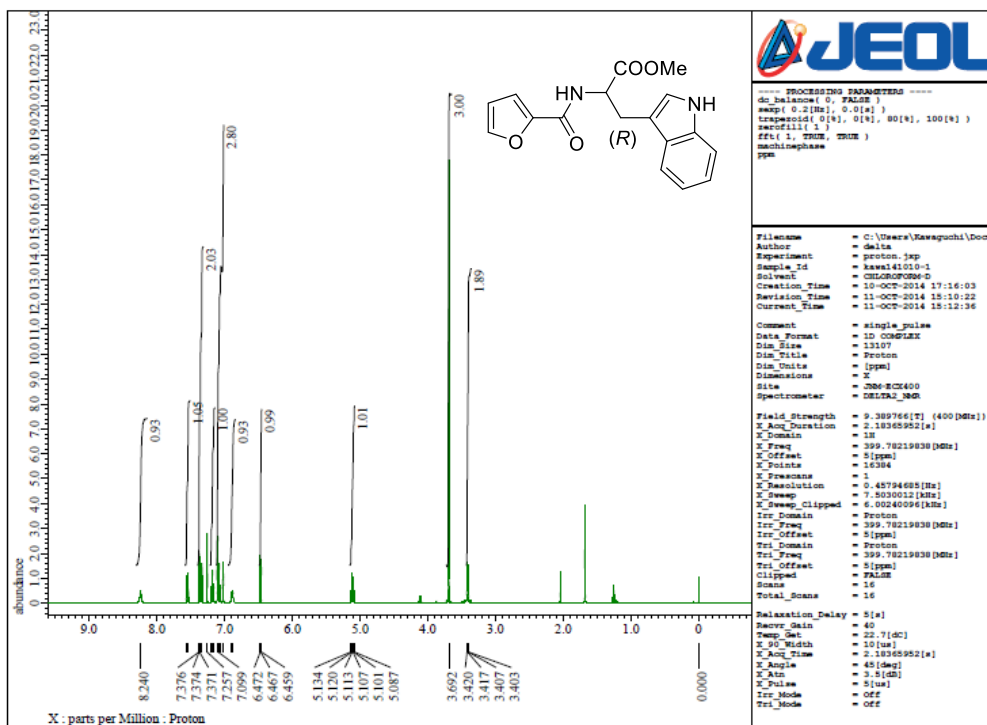

### <sup>1</sup>H NMR spectrum for compound 5

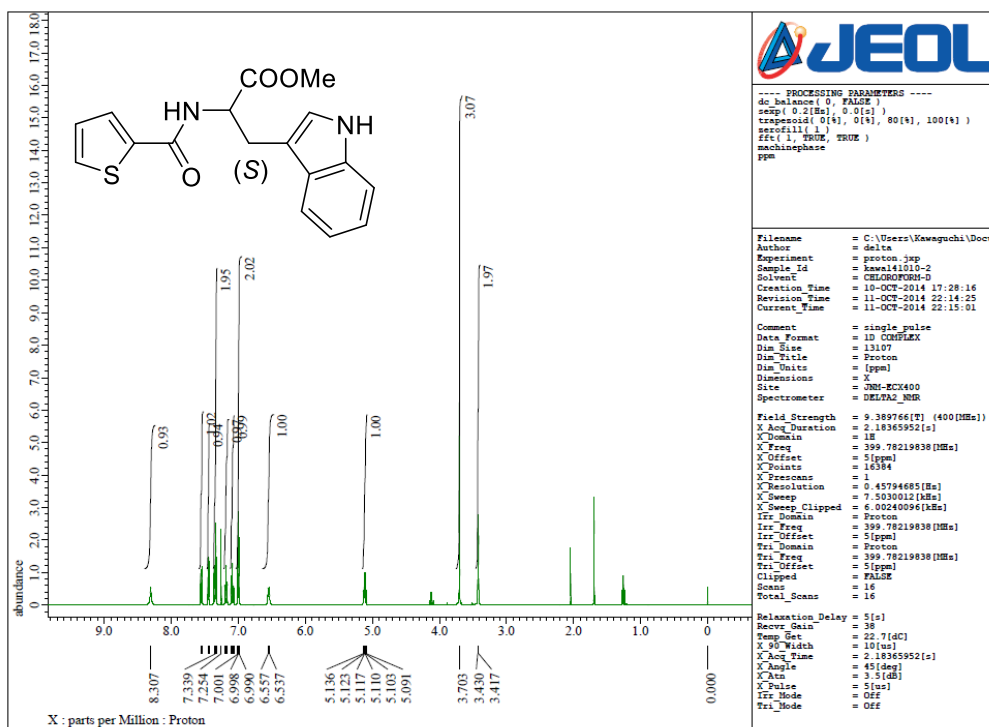

### <sup>1</sup>H NMR spectrum for compound 6

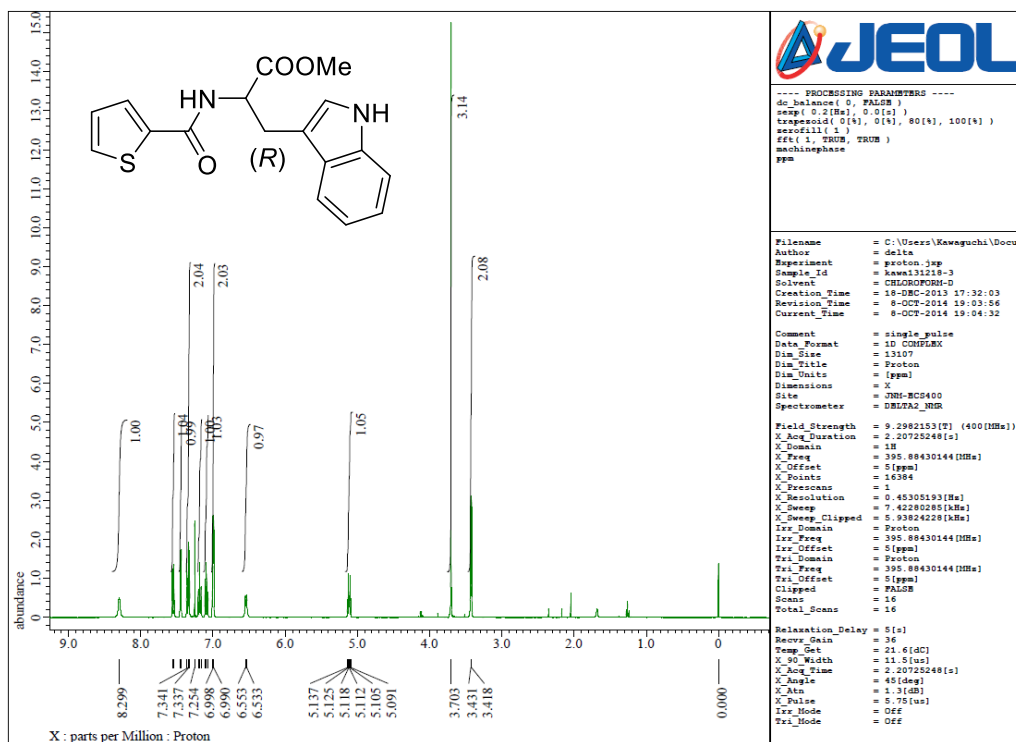

<sup>1</sup>H NMR spectrum for compound 7

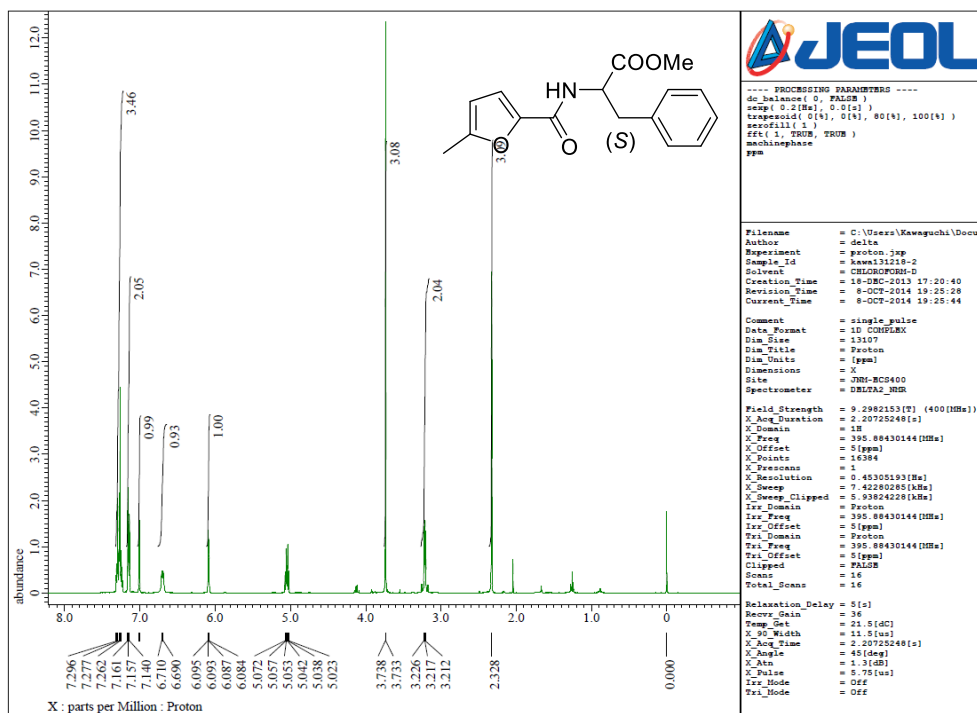

<sup>1</sup>H NMR spectrum for compound 8

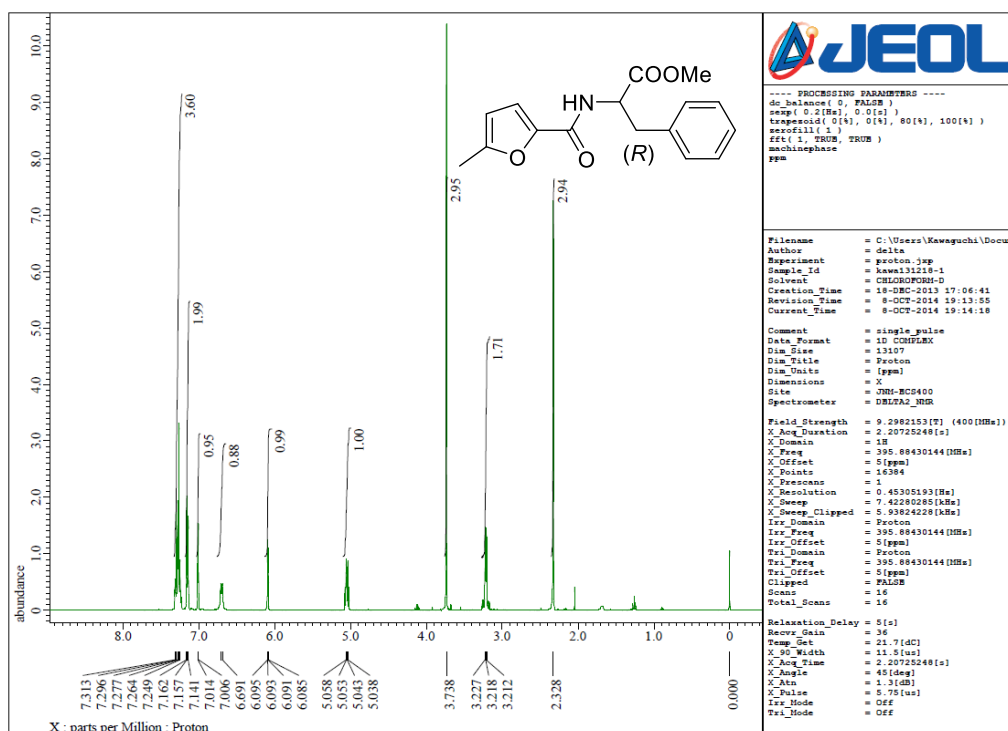

<sup>1</sup>H NMR spectrum for compound 9

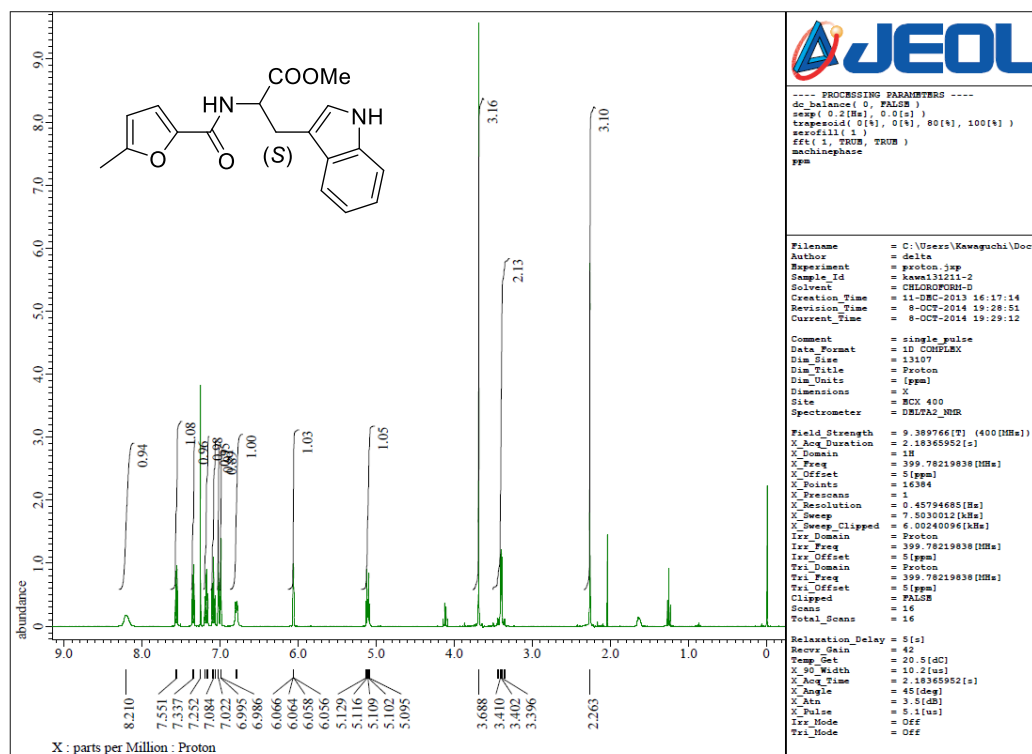

<sup>1</sup>H NMR spectrum for compound 10

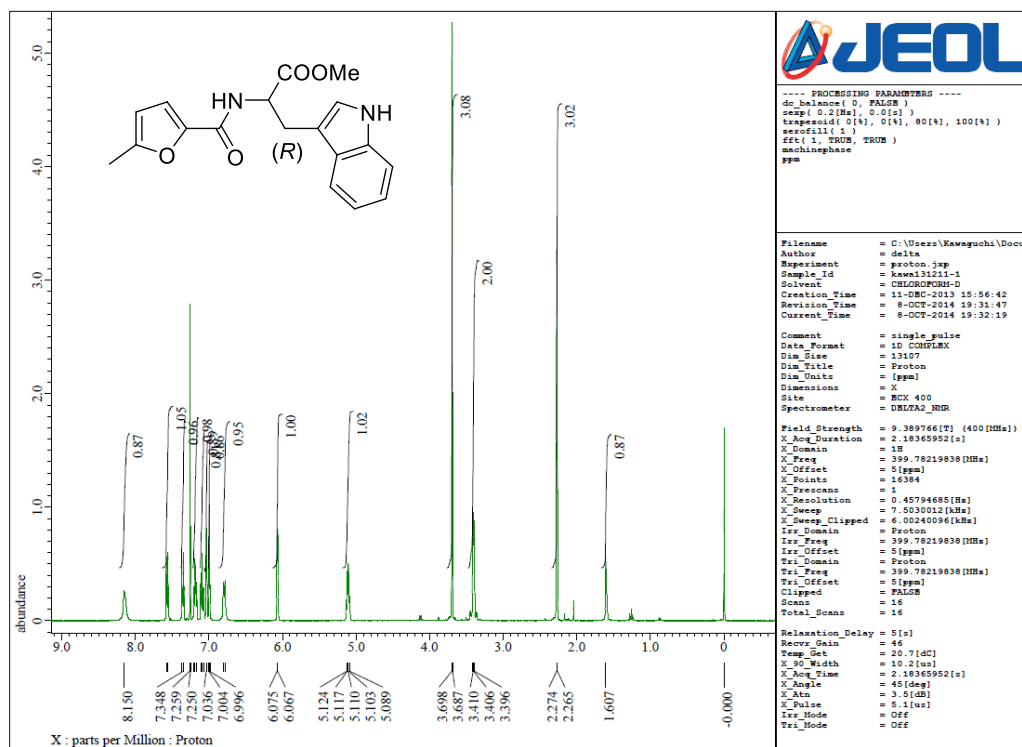

<sup>1</sup>H NMR spectrum for compound 11



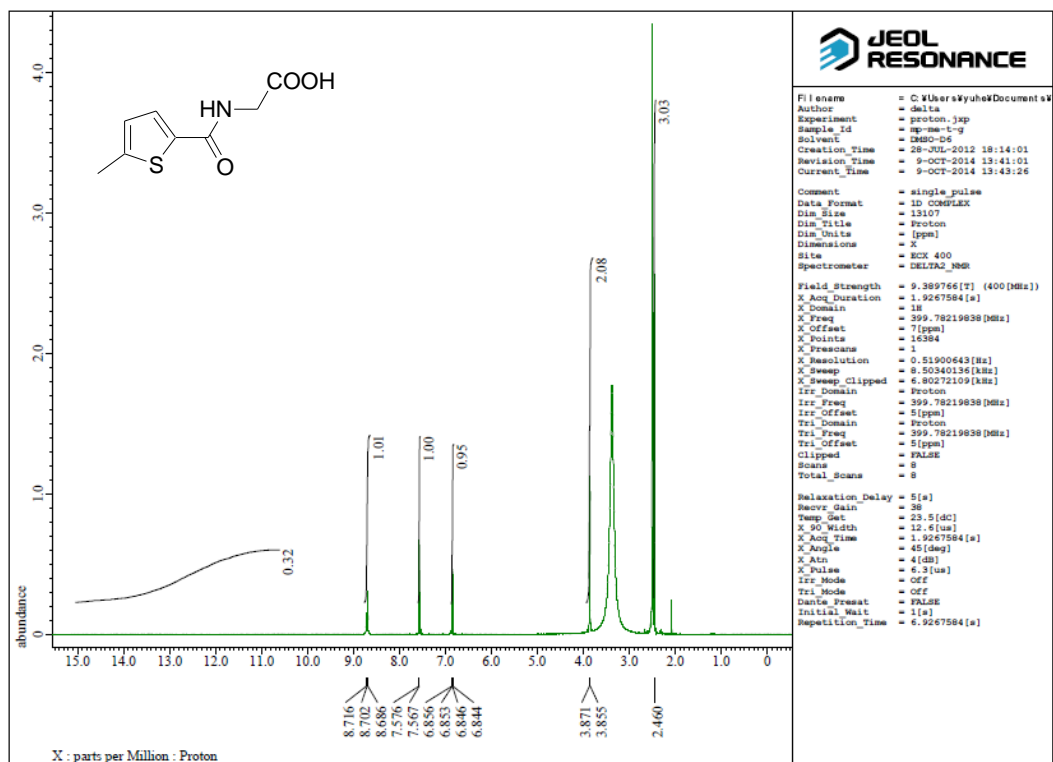

<sup>1</sup>H NMR spectrum for compound 12

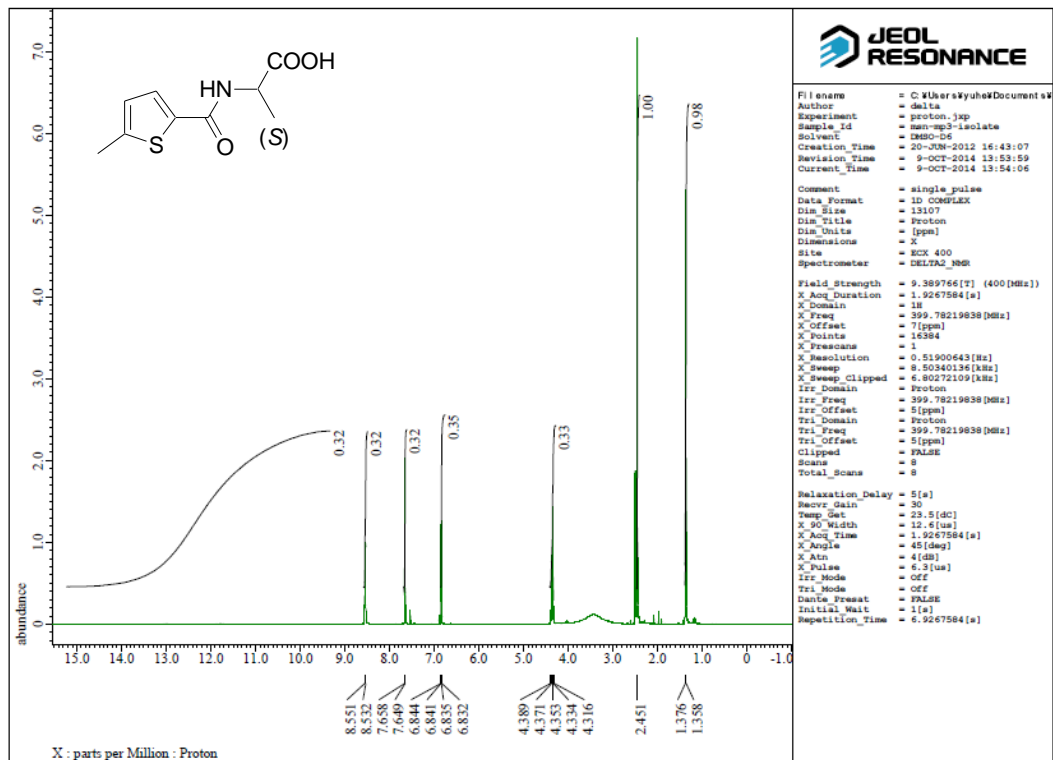

<sup>1</sup>H NMR spectrum for compound 13

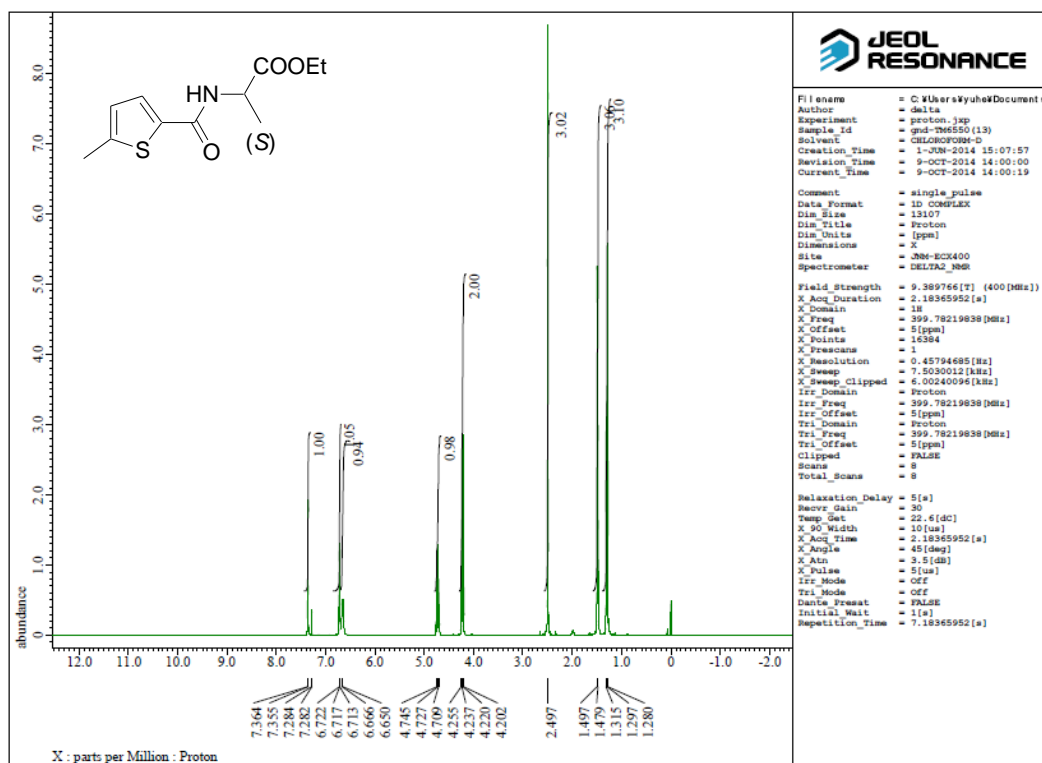

<sup>1</sup>H NMR spectrum for compound 14

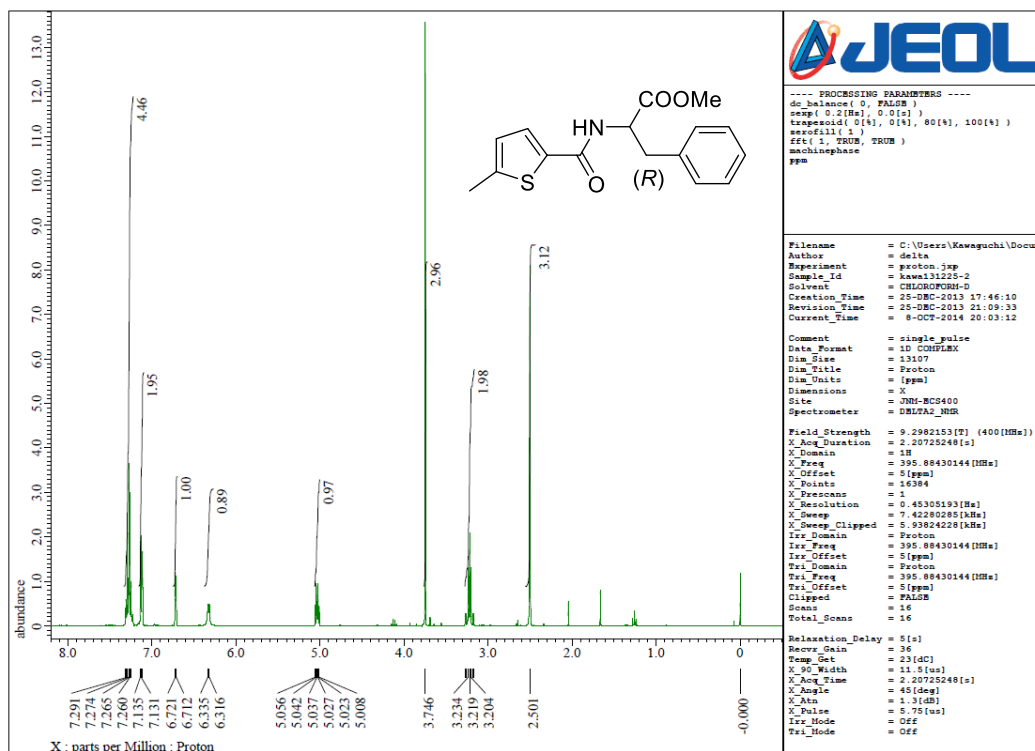

<sup>1</sup>H NMR spectrum for compound 15

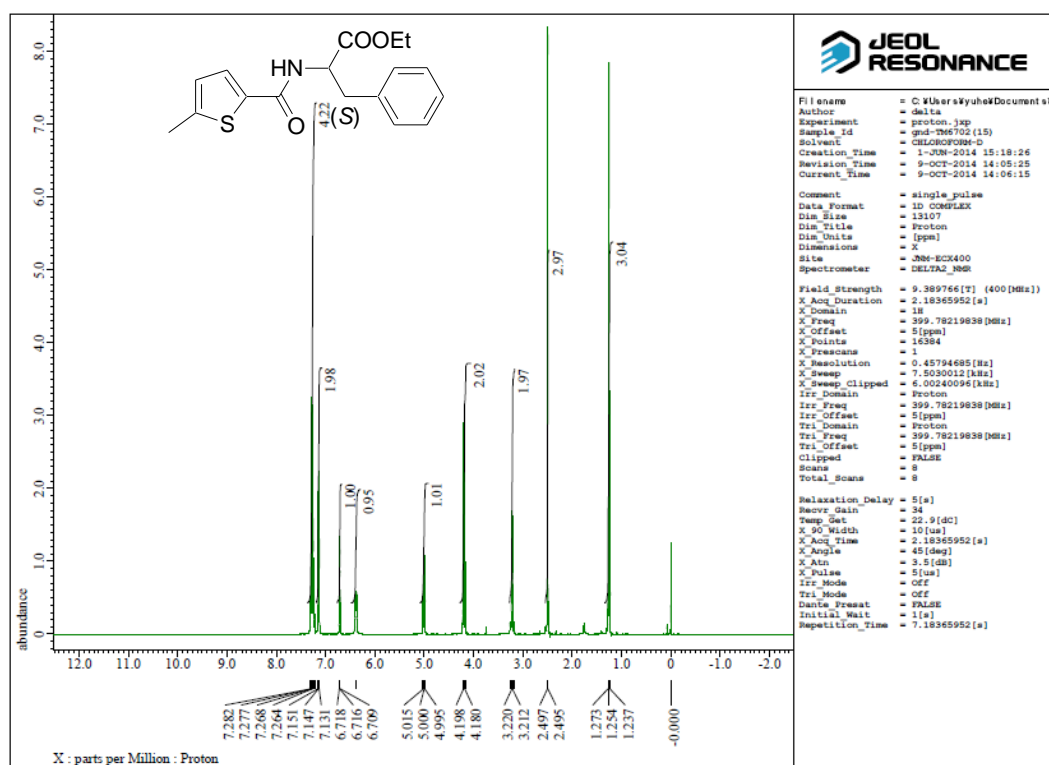

<sup>1</sup>H NMR spectrum for compound 16

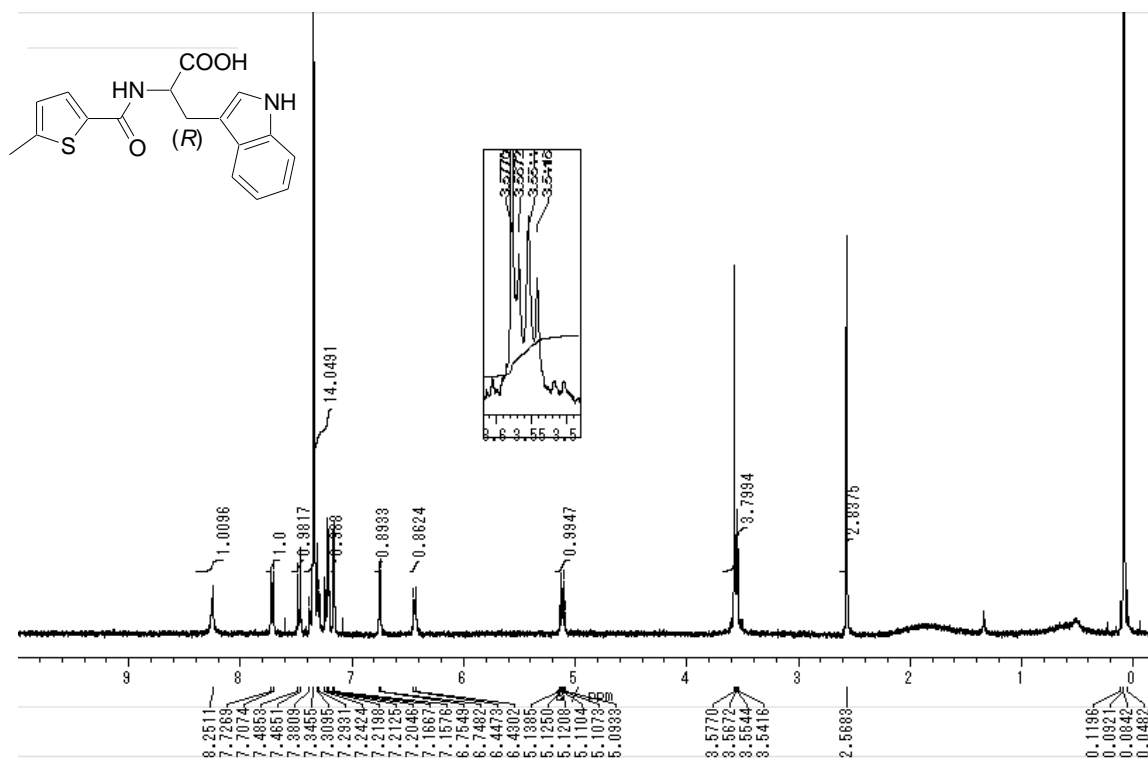

<sup>1</sup>H NMR spectrum for compound 17

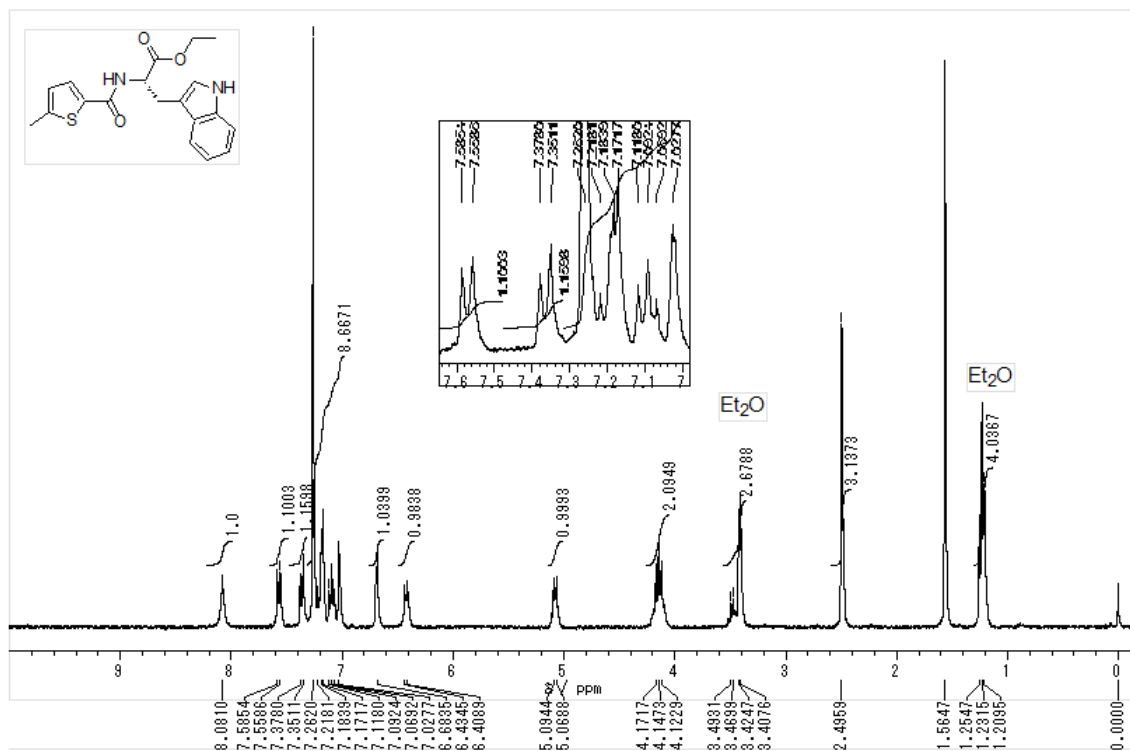

**<sup>1</sup>H NMR spectrum for compound 18**

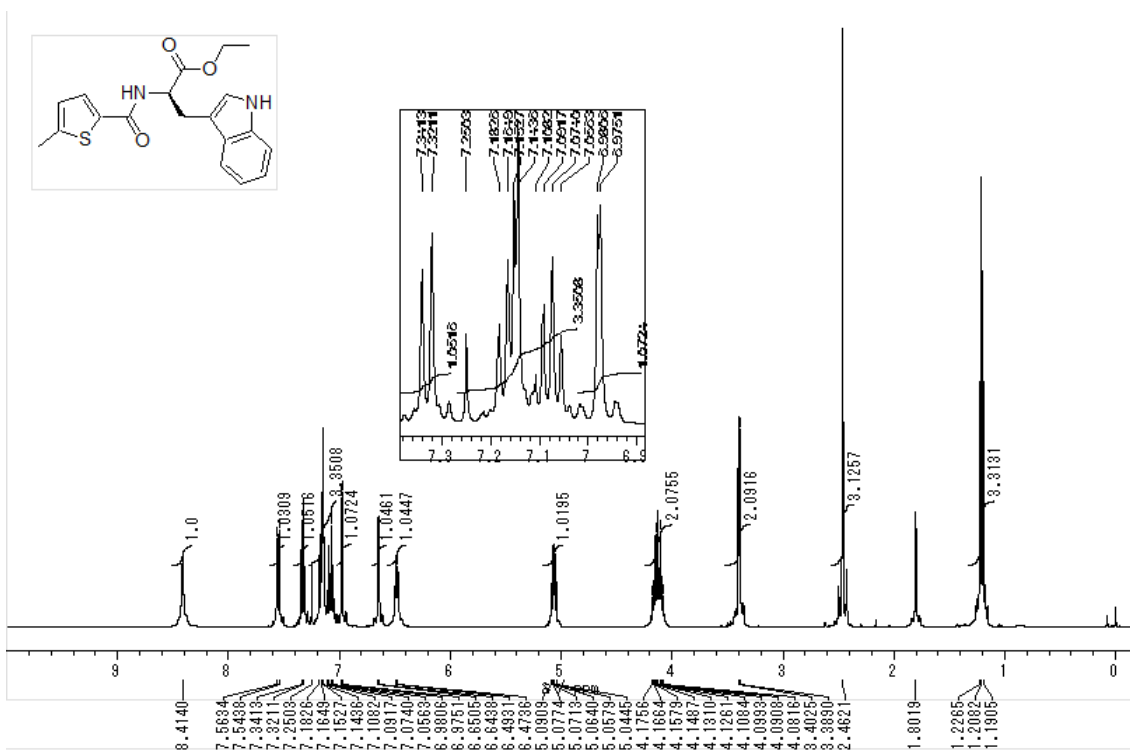

**<sup>1</sup>H NMR spectrum for compound 19**

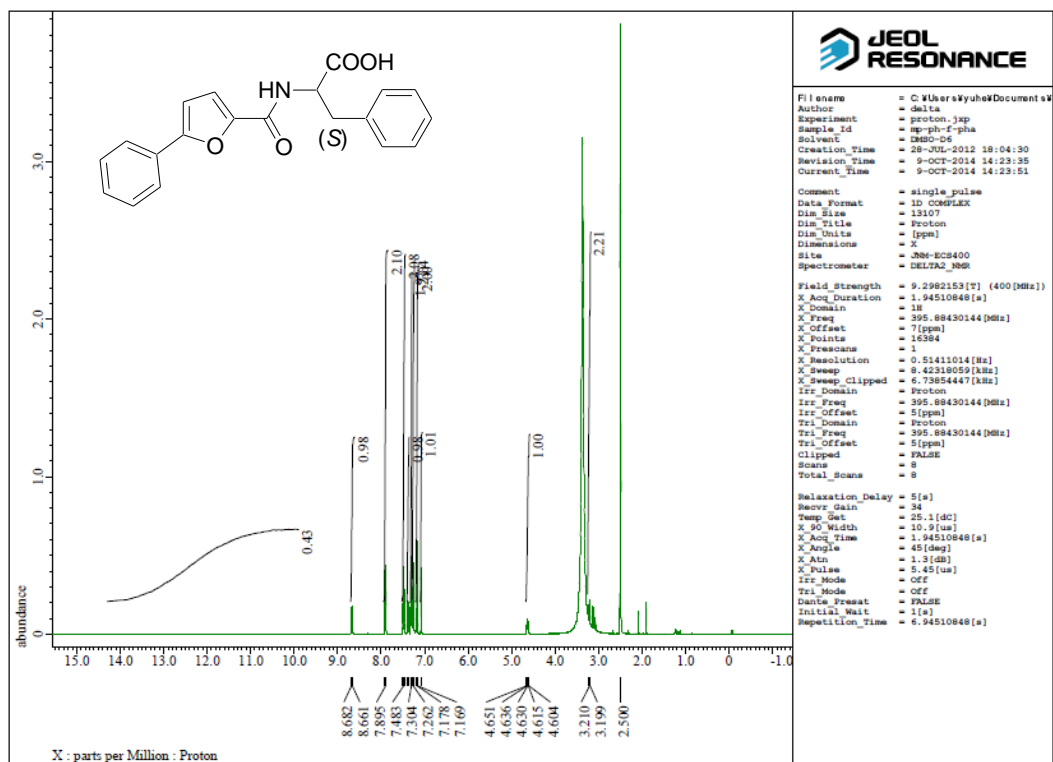

<sup>1</sup>H NMR spectrum for compound 20

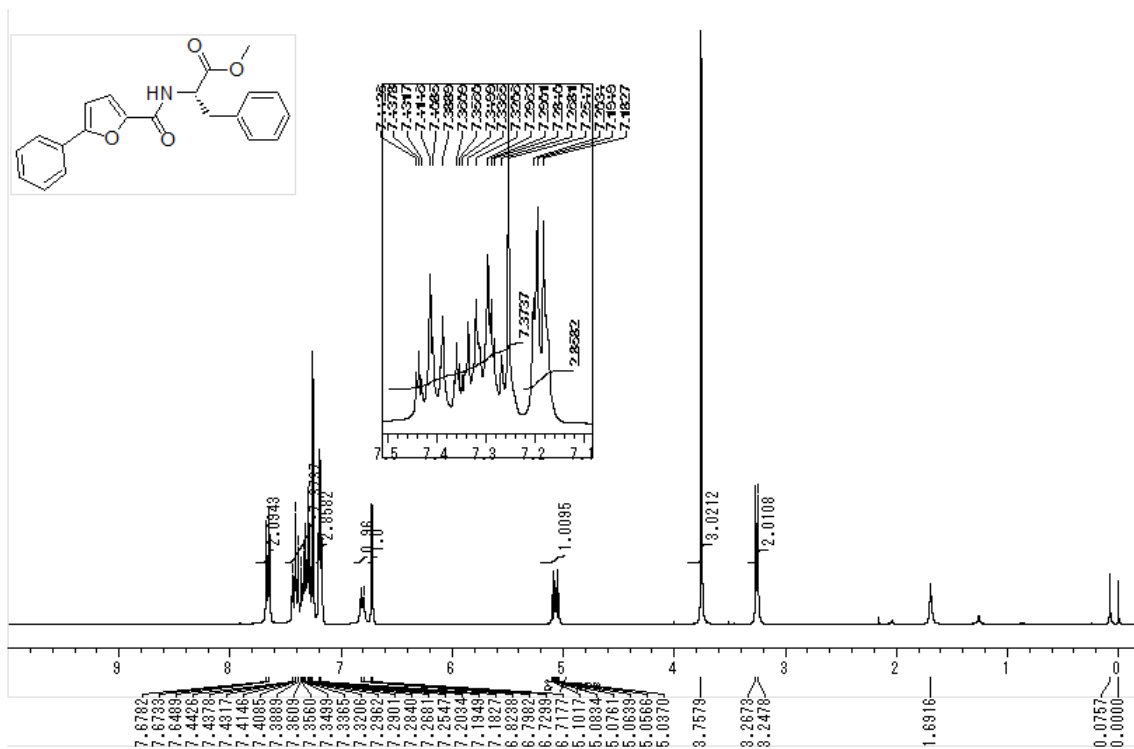

<sup>1</sup>H NMR spectrum for compound 21

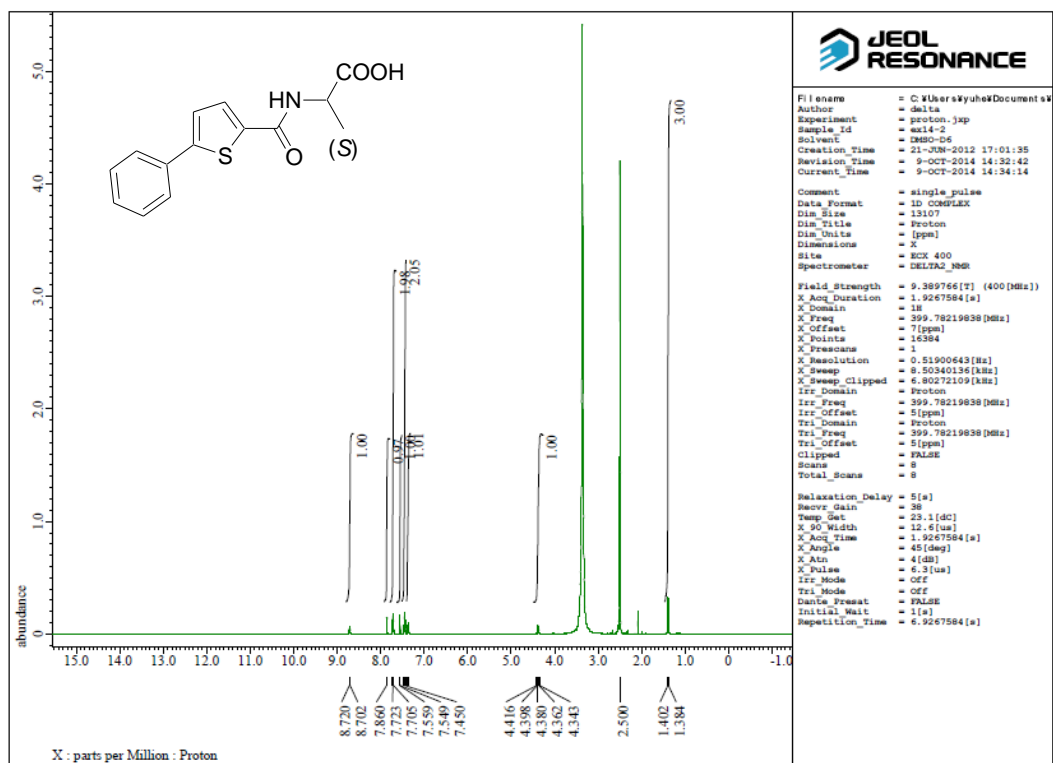

<sup>1</sup>H NMR spectrum for compound 22

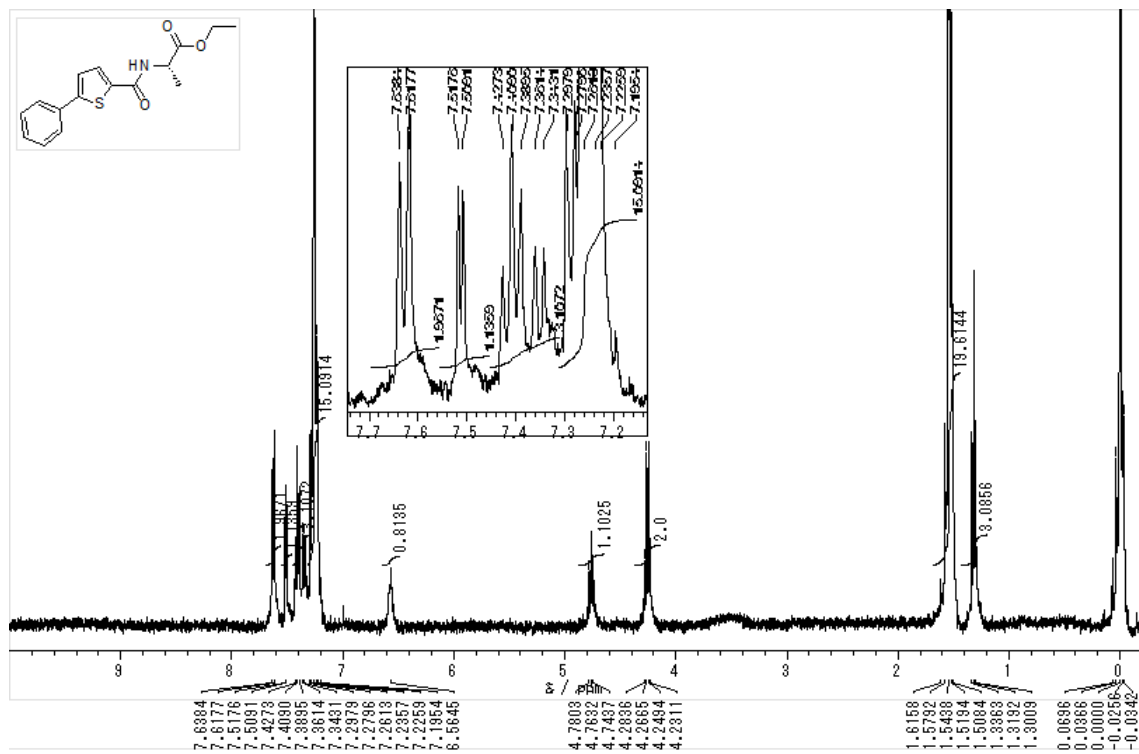

<sup>1</sup>H NMR spectrum for compound 23

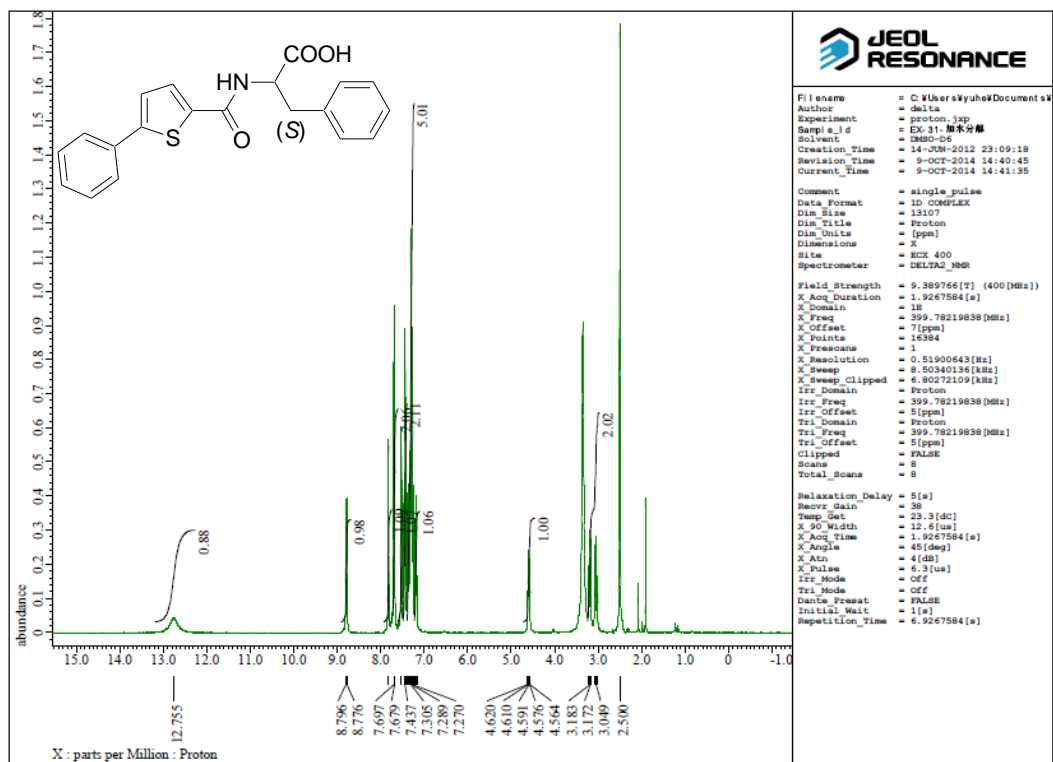

<sup>1</sup>H NMR spectrum for compound 24

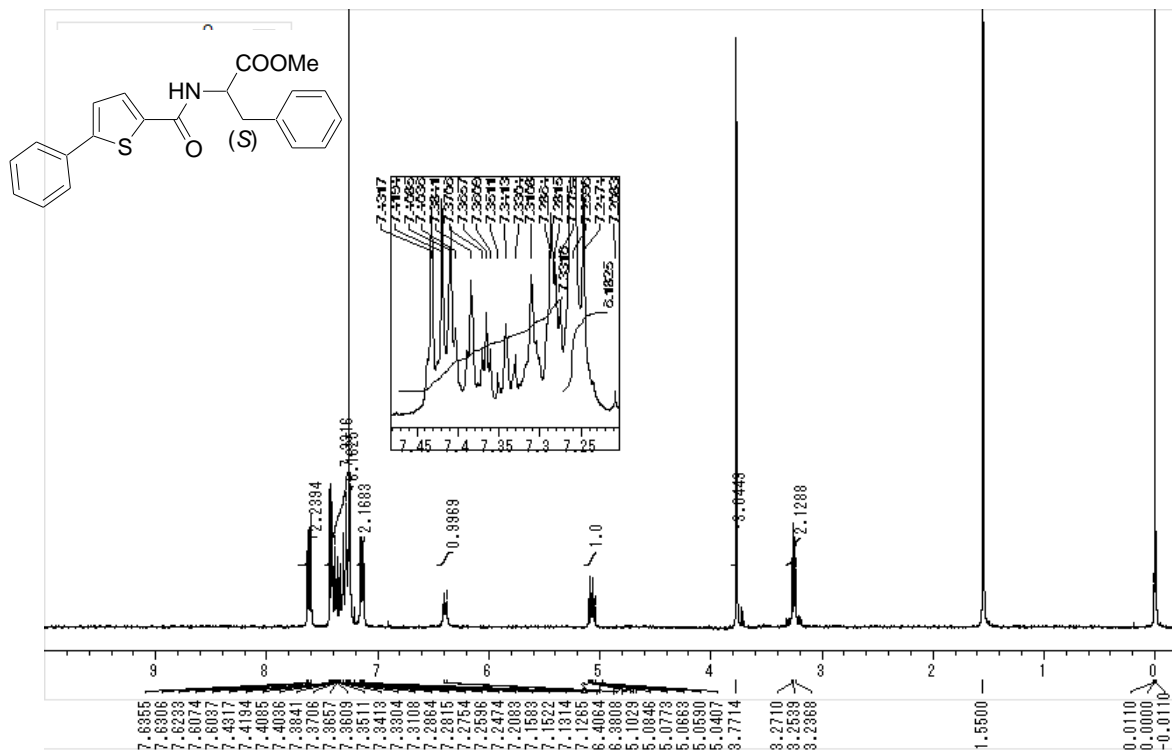

<sup>1</sup>H NMR spectrum for compound 25

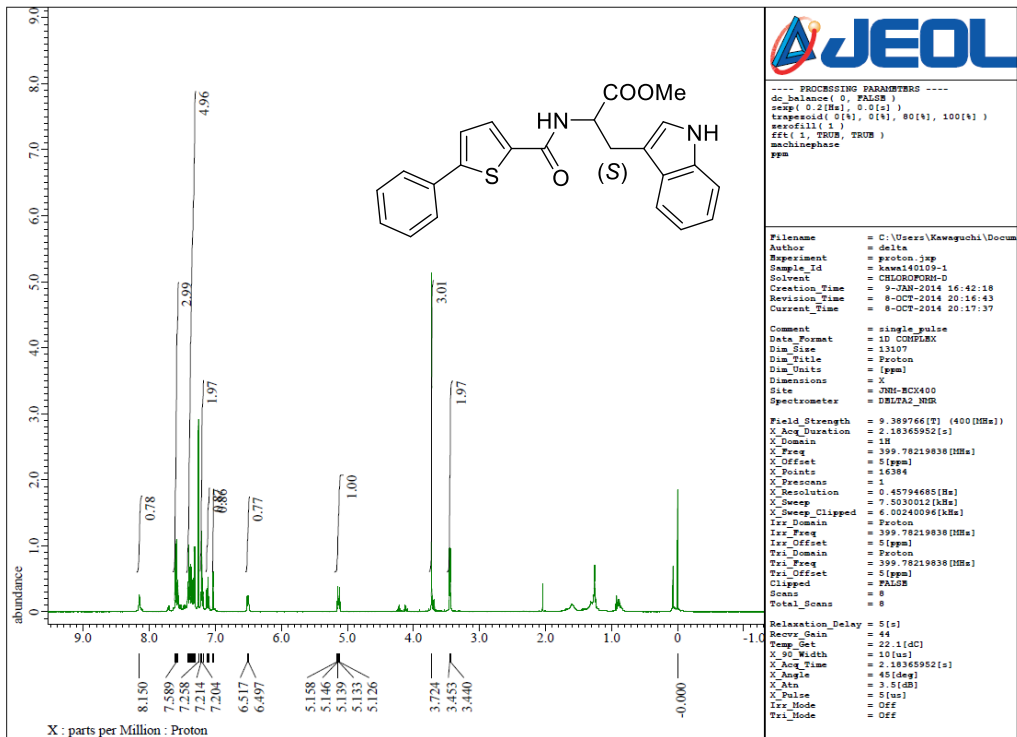

<sup>1</sup>H NMR spectrum for compound 26

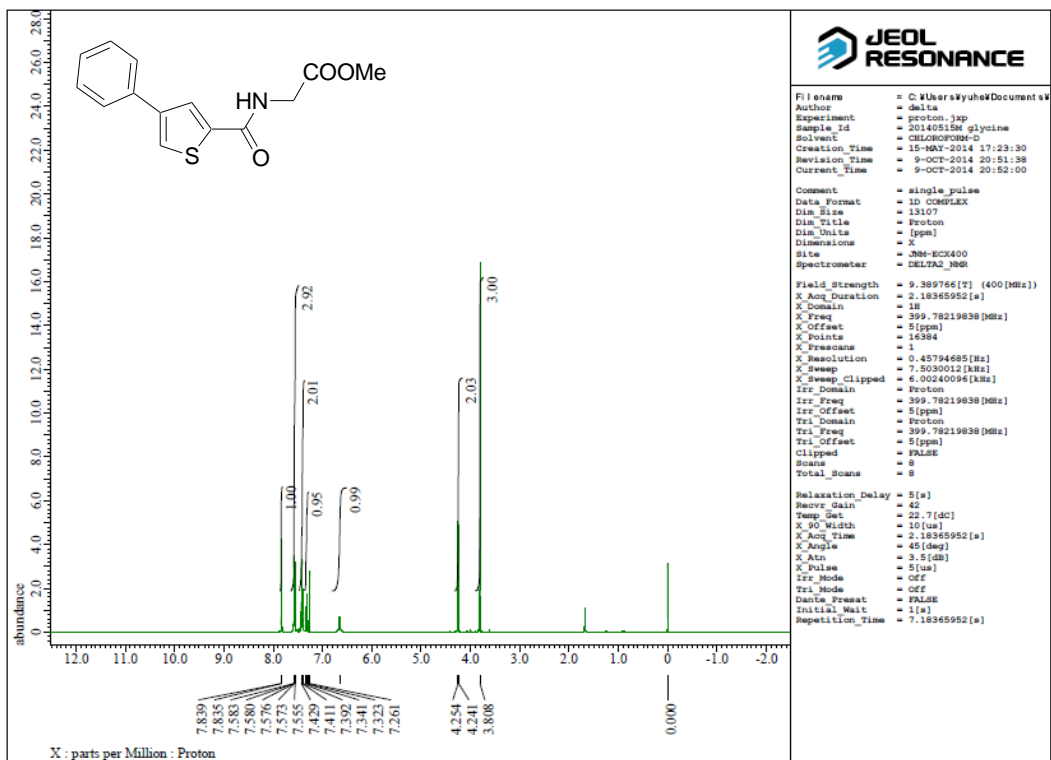

<sup>1</sup>H NMR spectrum for compound 27



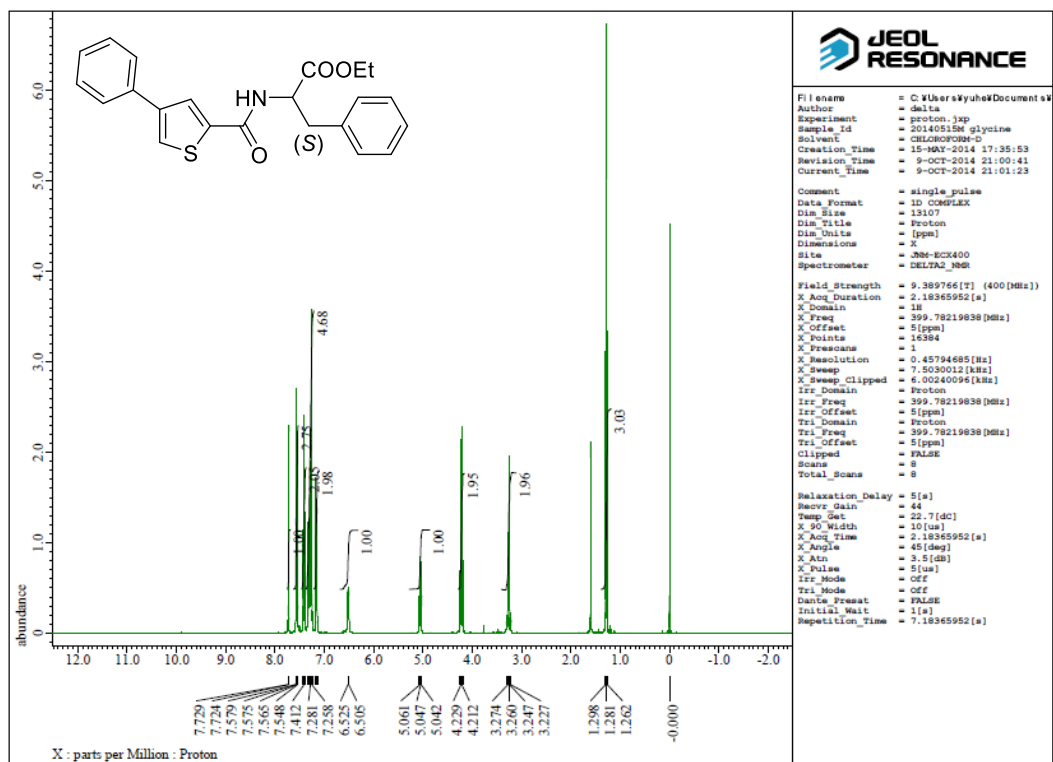

<sup>1</sup>H NMR spectrum for compound 28

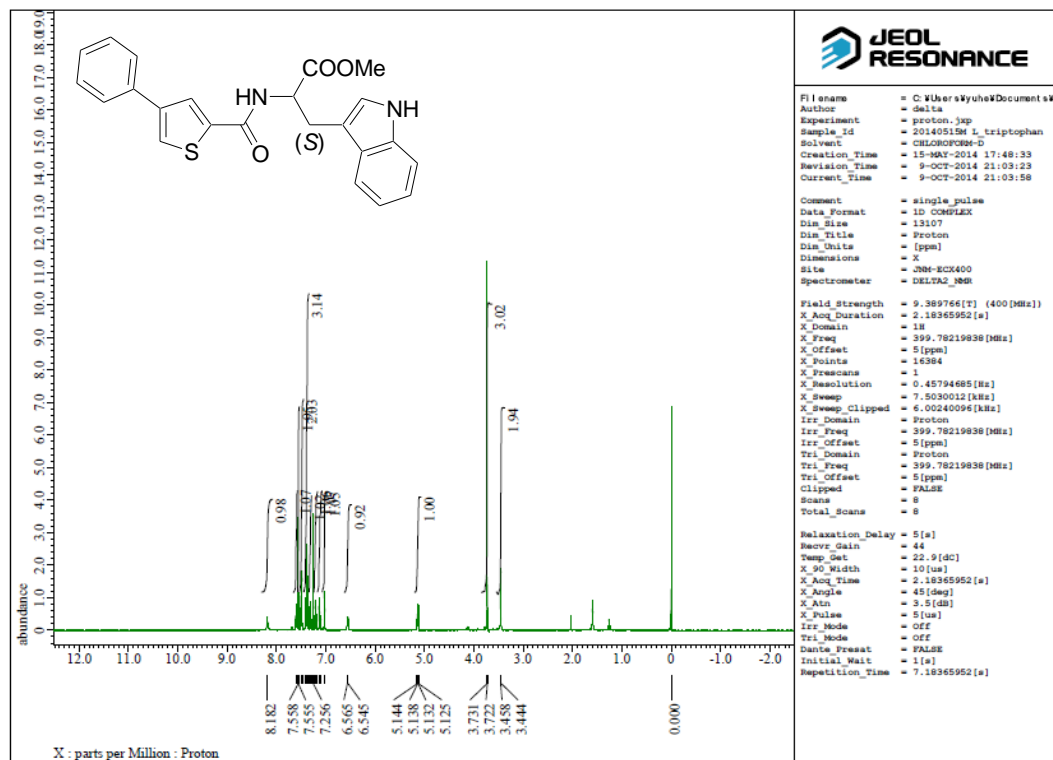

<sup>1</sup>H NMR spectrum for compound 29

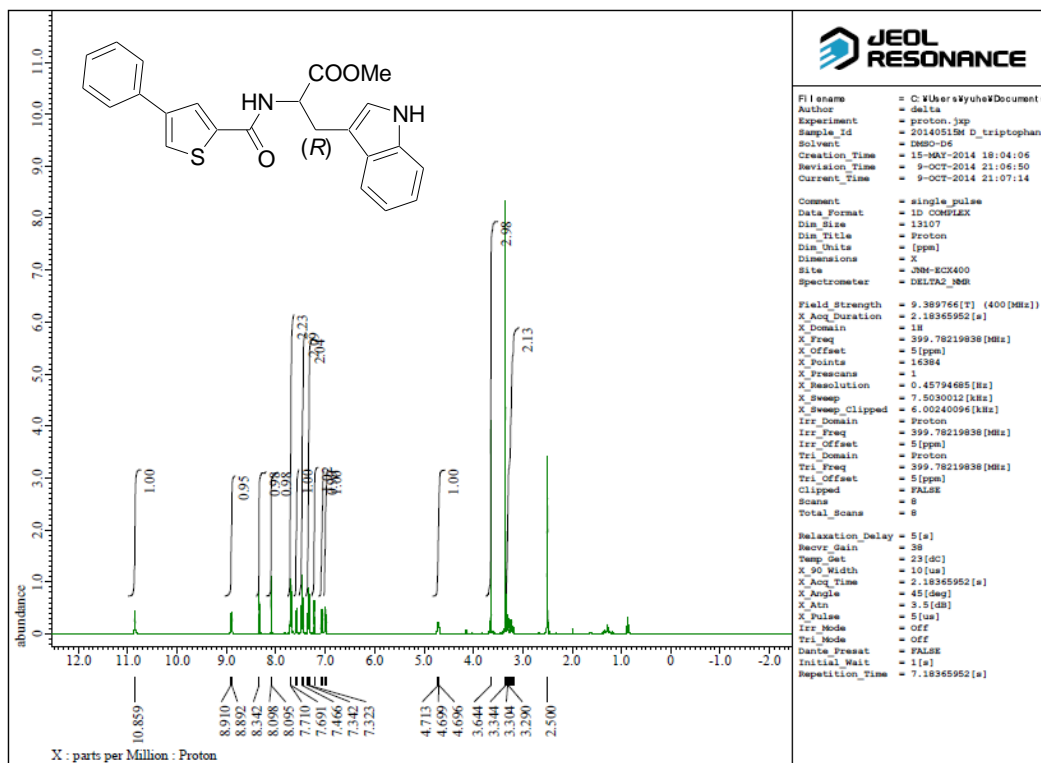

<sup>1</sup>H NMR spectrum for compound 30

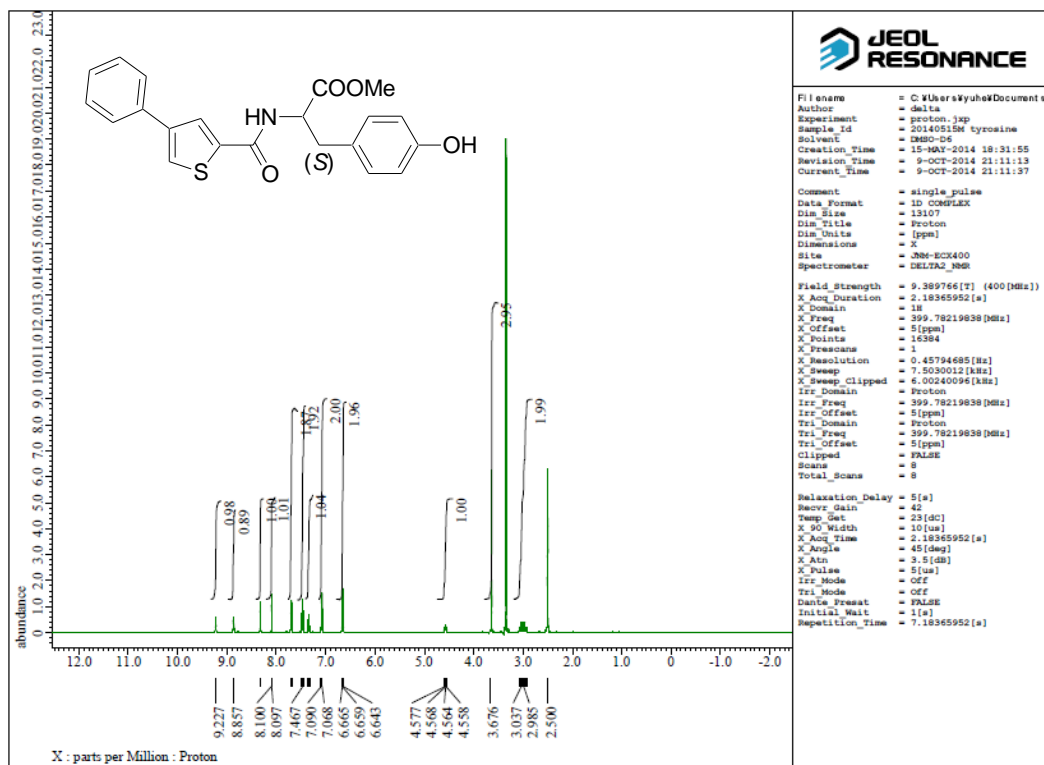

<sup>1</sup>H NMR spectrum for compound 31

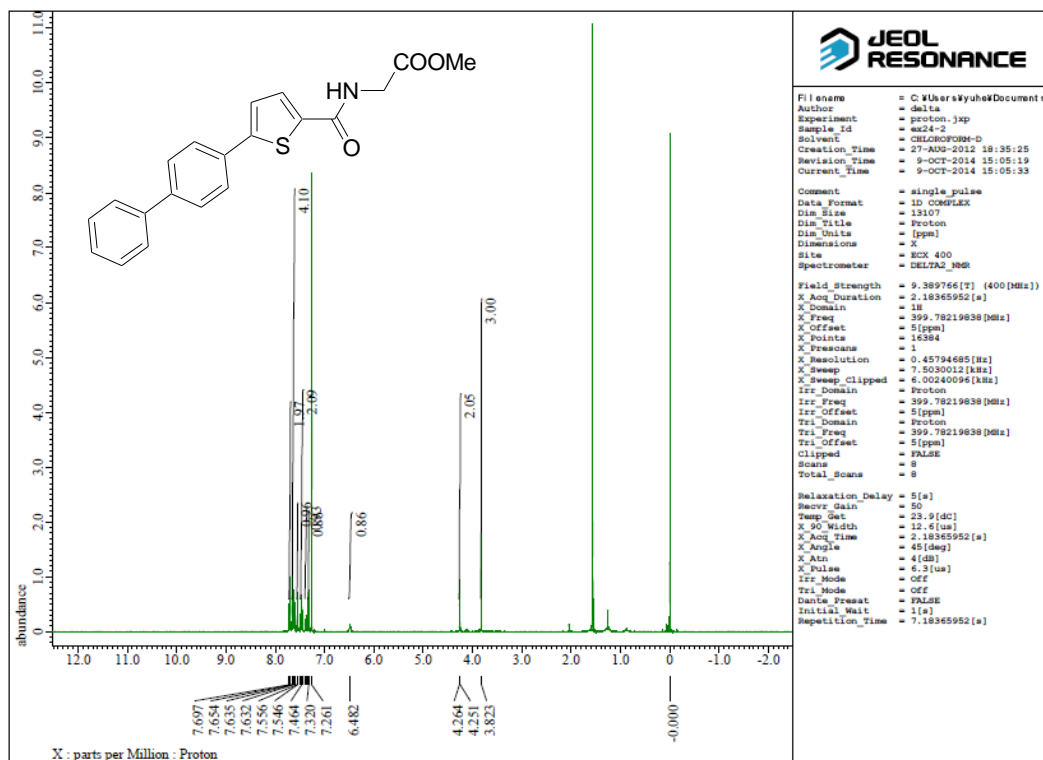

<sup>1</sup>H NMR spectrum for compound 32

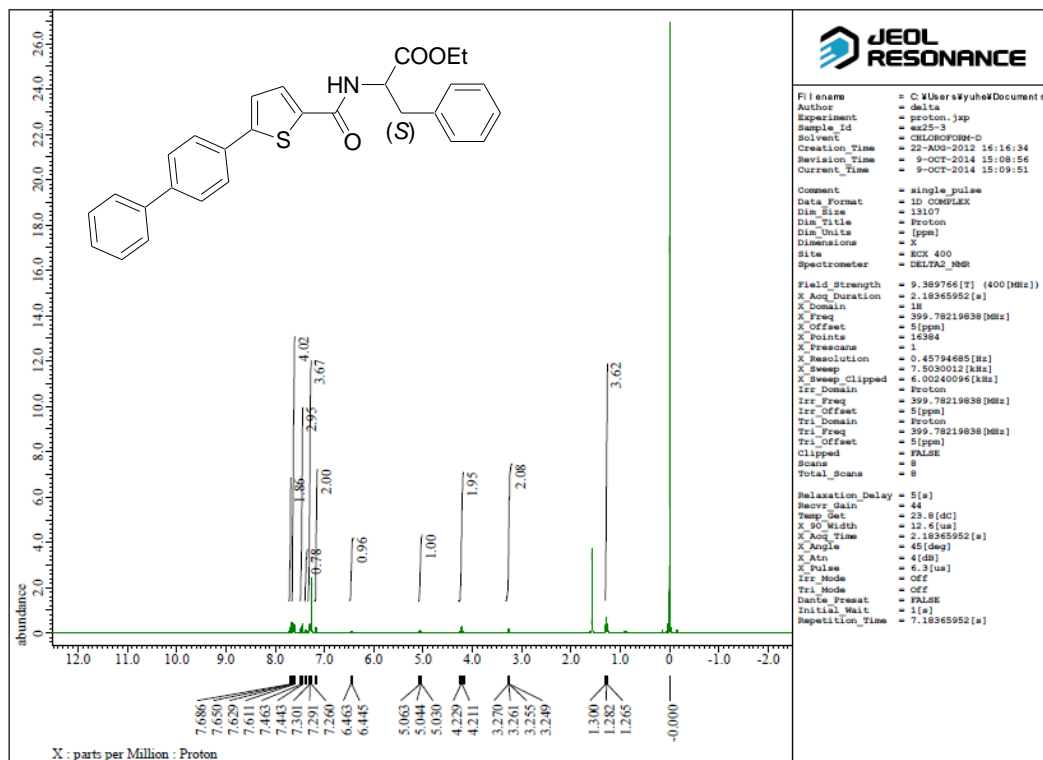

<sup>1</sup>H NMR spectrum for compound 33

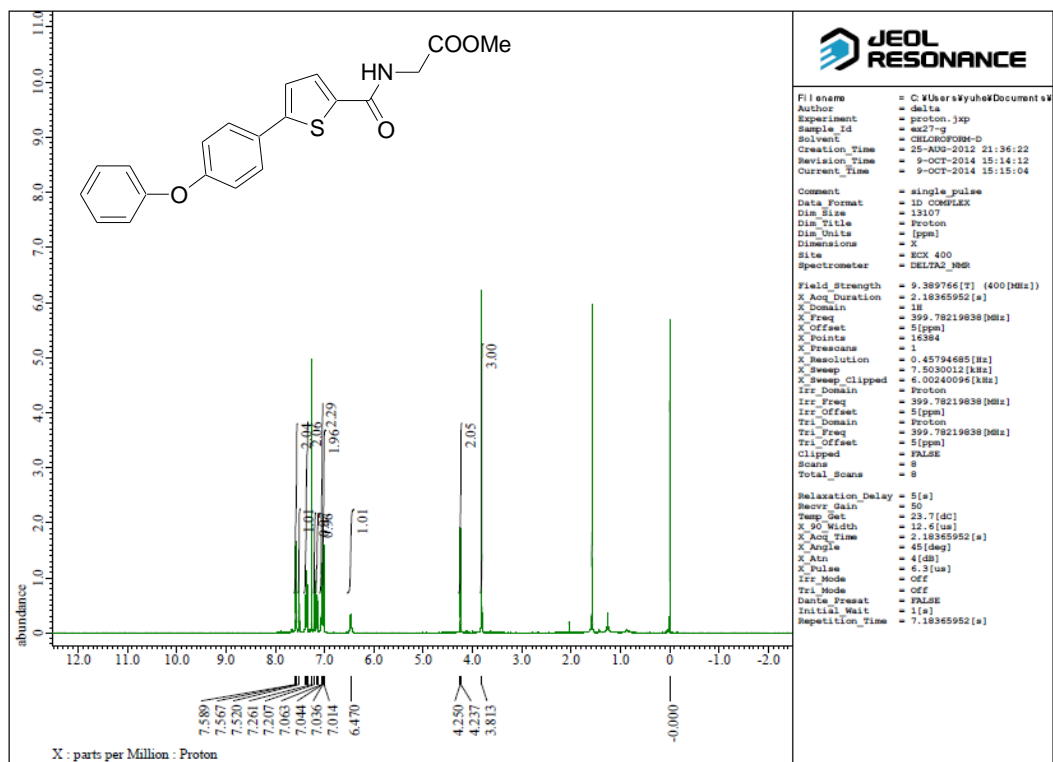

<sup>1</sup>H NMR spectrum for compound 34

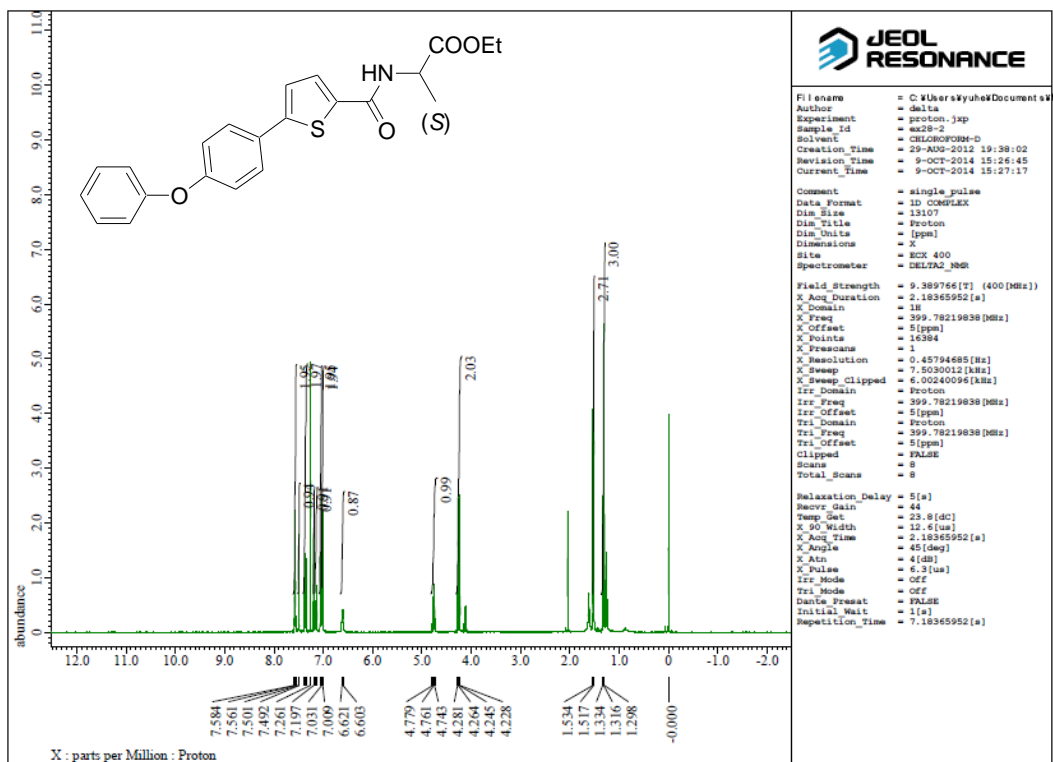

<sup>1</sup>H NMR spectrum for compound 35

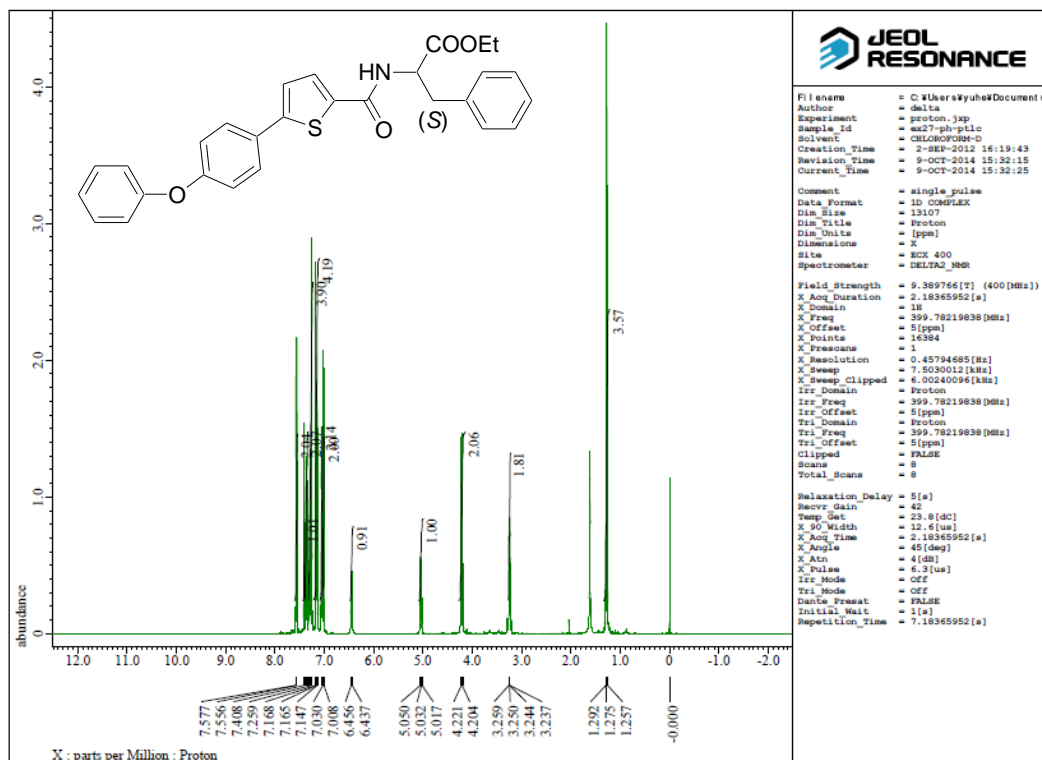

<sup>1</sup>H NMR spectrum for compound 36

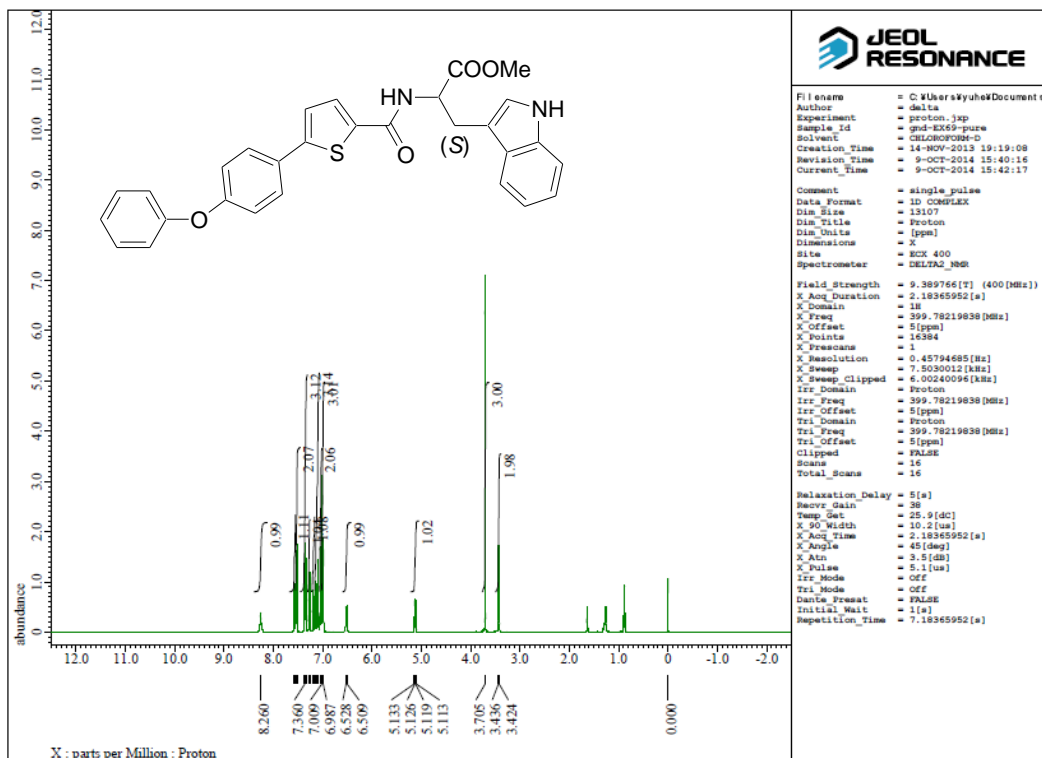

<sup>1</sup>H NMR spectrum for compound 37

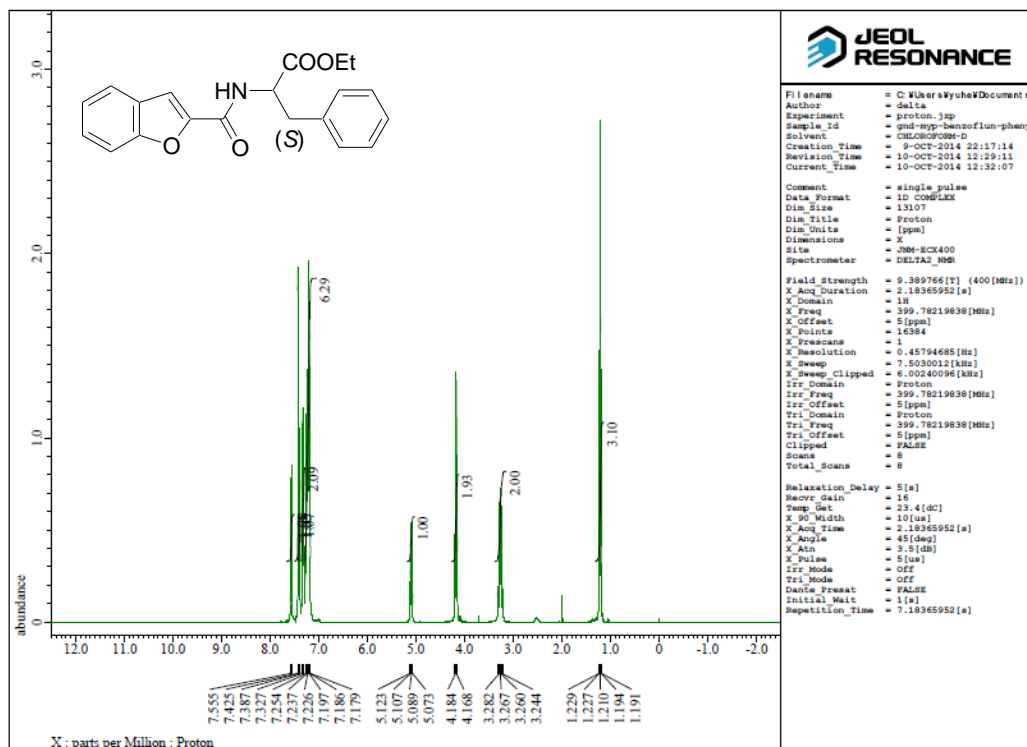

<sup>1</sup>H NMR spectrum for compound 38

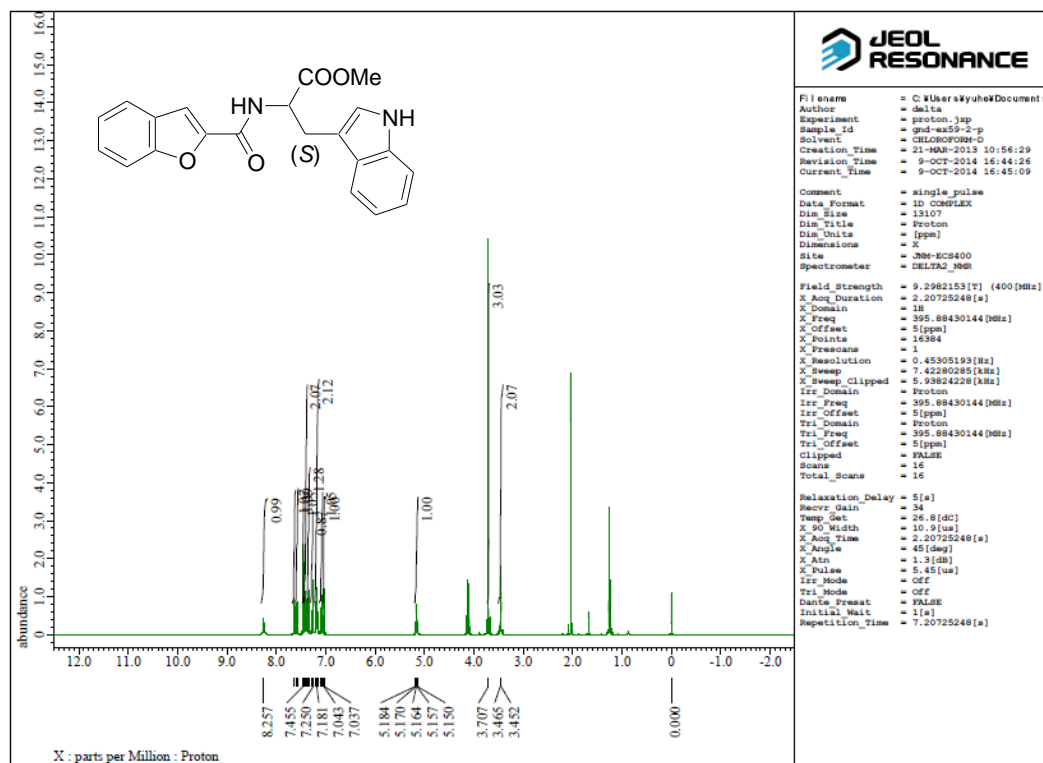

<sup>1</sup>H NMR spectrum for compound 39

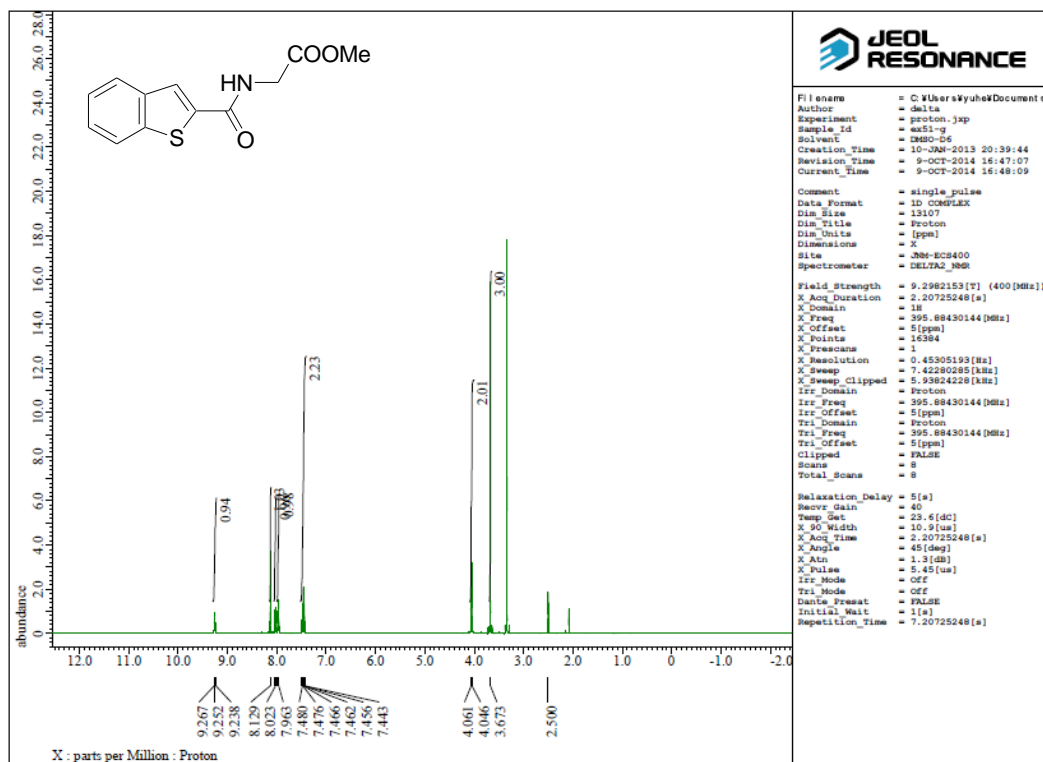

<sup>1</sup>H NMR spectrum for compound 40

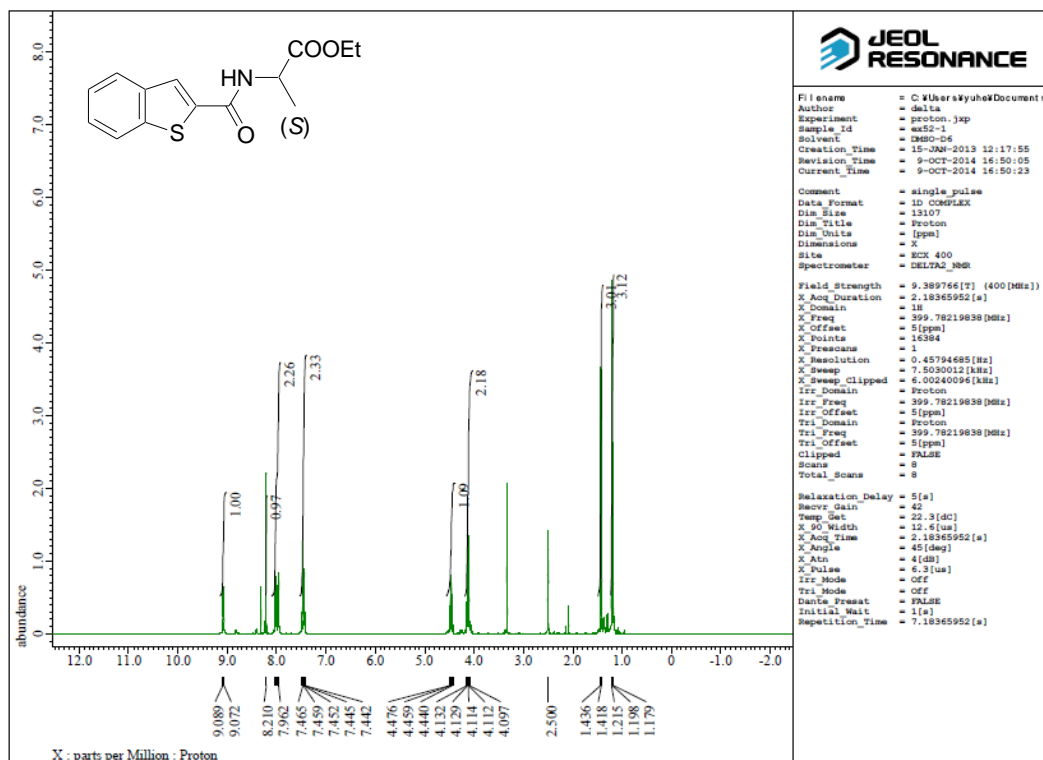

<sup>1</sup>H NMR spectrum for compound 41

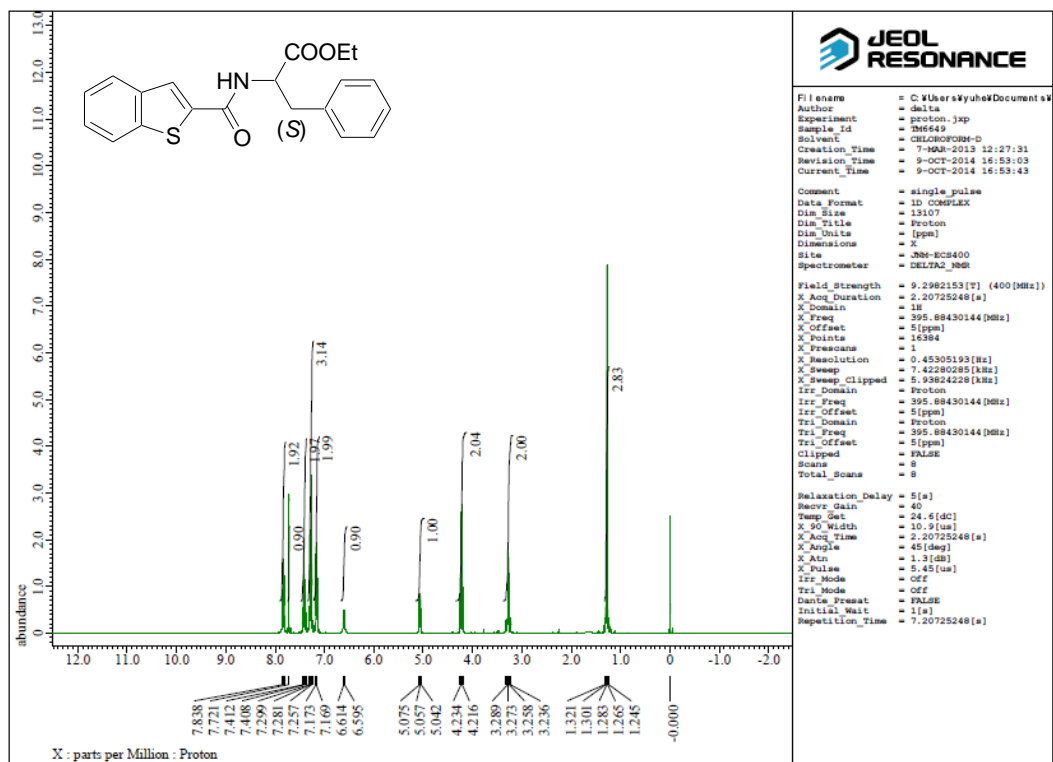

<sup>1</sup>H NMR spectrum for compound 42

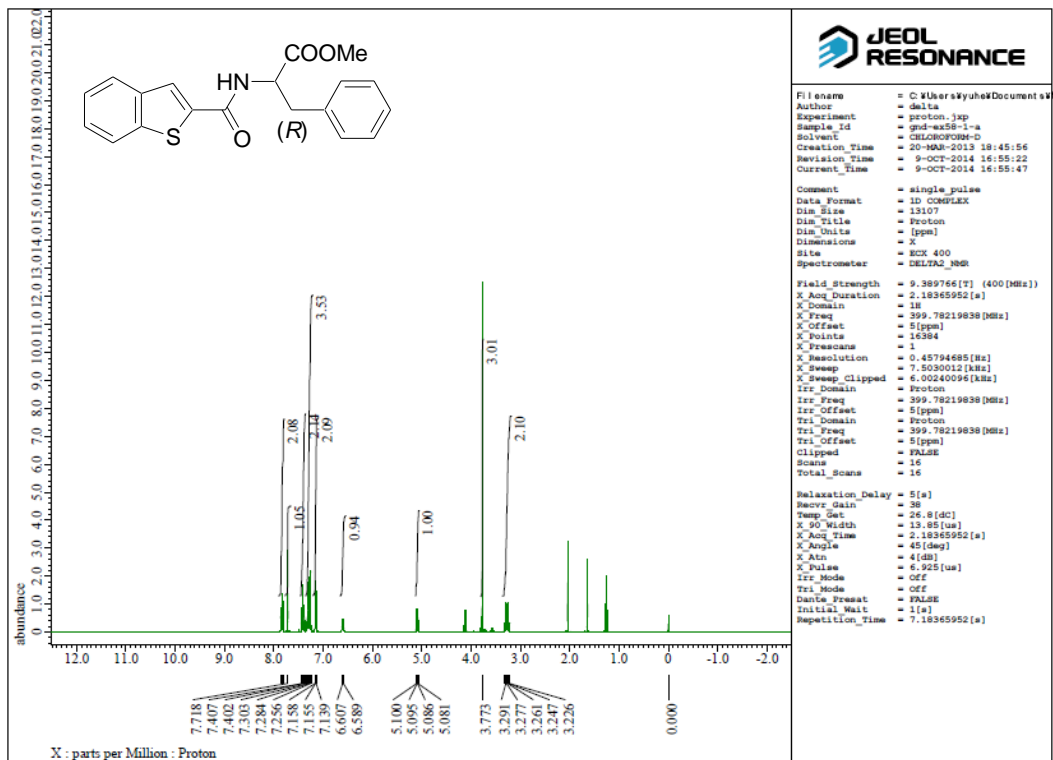

<sup>1</sup>H NMR spectrum for compound 43



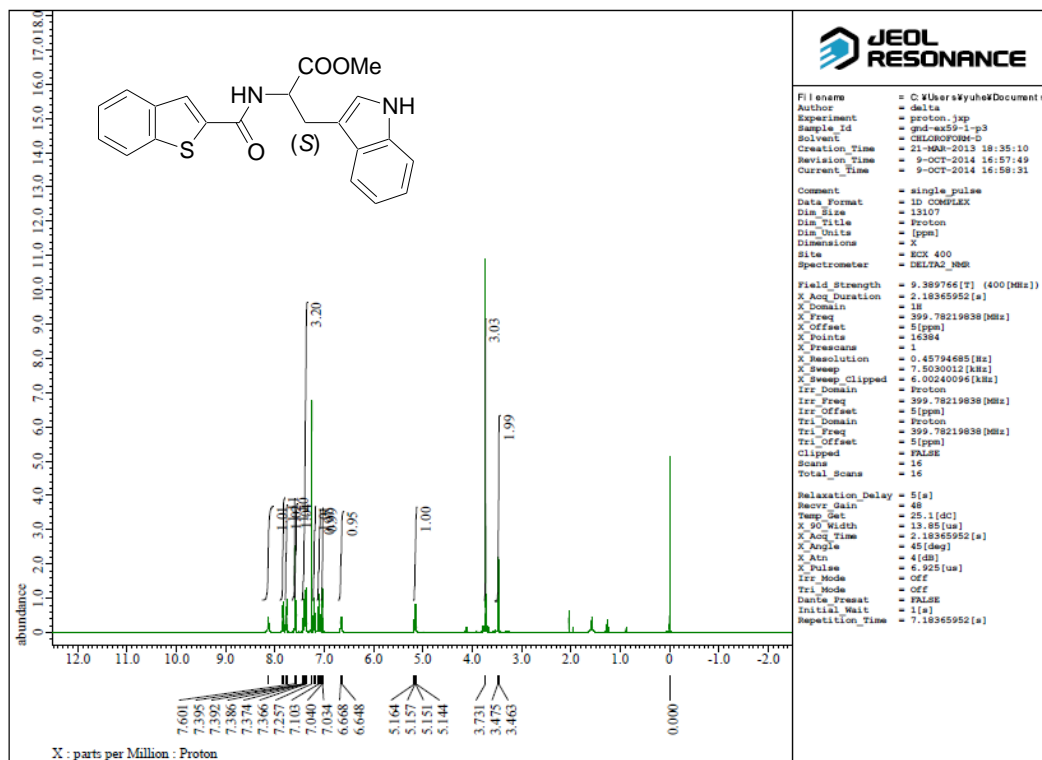

<sup>1</sup>H NMR spectrum for compound 44

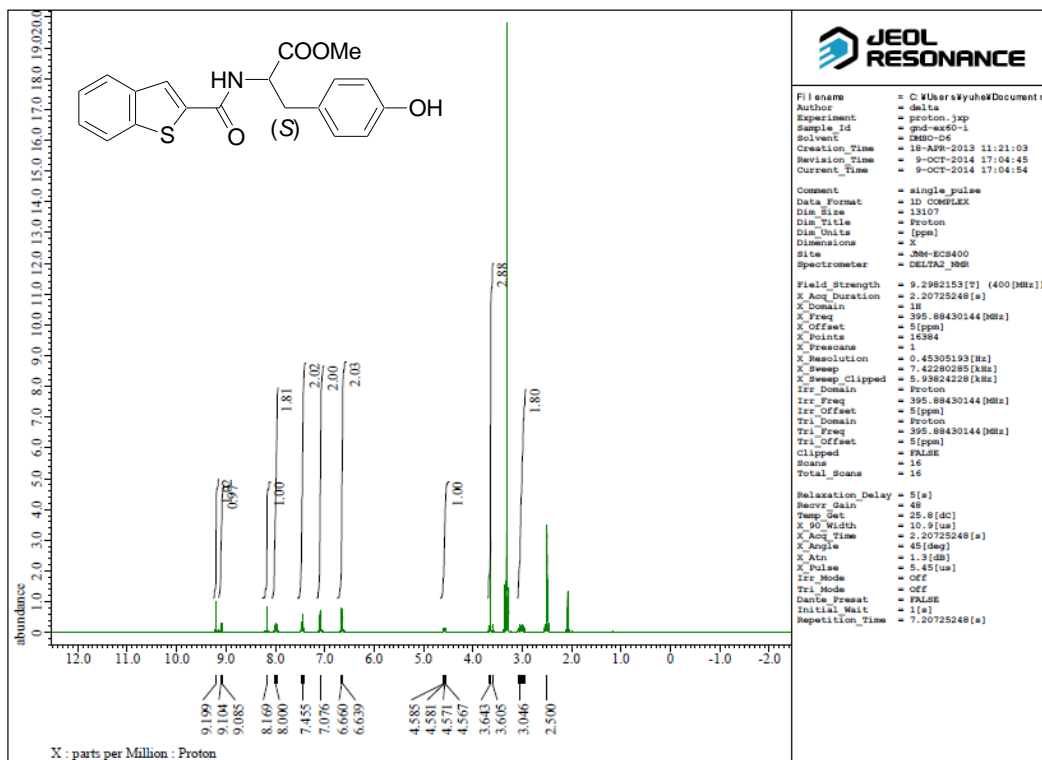

Supplement: s1 [file s1]
